# Supplementary material for: Genome-Wide Identification and Characterization of Gibberellic Acid-Stimulated Arabidopsis Gene Family in Pineapple (Ananas comosus)
Source: MDPI journal article supplement (doi:10.3390/ijms242317063), 2023-12-02
Supplement: s1 [file s1]

**Table S5:** Ka/Ks ratio for the pineapple *AcGASA* gene.

| Gene pair name   | Ka_Ks       |
|------------------|-------------|
| AcGASA1-AcGASA6  | 0.643300335 |
| AcGASA9-AcGASA10 | 0.365147124 |
| AcGASA1-AcGASA9  | 0.35433996  |
| AcGASA2-AcGASA12 | 0.351344723 |
| AcGASA9-AcGASA10 | 0.365147124 |
| AcGASA1-AcGASA10 | 0.542003055 |
| AcGASA2-AcGASA12 | 0.351344723 |
