# Supplementary material for: Genome-Wide Identification and Characterization of Gibberellic Acid-Stimulated Arabidopsis Gene Family in Pineapple (Ananas comosus)
Source: MDPI journal article supplement (doi:10.3390/ijms242317063), 2023-12-02
Supplement: s1 [file s1]

**Table S4:** Non-redundant AcGASAS gene IDs associated with the syntenic relationships among pineapple and the other 5 species

| Ananas comosus-Arabidopsis thaliana | Ananas comosus-Oryza sativa | Ananas comosus-Vitis vinifera | Ananas comosus-Zea mays | Ananas comosus-Nicotiana tabacum |
|-------------------------------------|-----------------------------|-------------------------------|-------------------------|----------------------------------|
| AcGASA2                             | AcGASA2                     | AcGASA1                       | AcGASA3                 | AcGASA15                         |
| AcGASA6                             | AcGASA5                     | AcGASA2                       | AcGASA6                 |                                  |
| AcGASA15                            | AcGASA6                     | AcGASA6                       | AcGASA7                 |                                  |
|                                     | AcGASA7                     | AcGASA9                       | AcGASA10                |                                  |
|                                     | AcGASA10                    | AcGASA10                      |                         |                                  |
|                                     | AcGASA14                    | AcGASA11                      |                         |                                  |
|                                     | AcGASA15                    | AcGASA12                      |                         |                                  |
|                                     |                             | AcGASA15                      |                         |                                  |
