# Supplementary material for: Genome-Wide Identification and Characterization of Gibberellic Acid-Stimulated Arabidopsis Gene Family in Pineapple (Ananas comosus)
Source: MDPI journal article supplement (doi:10.3390/ijms242317063), 2023-12-02
Supplement: s1 [file s1]

| AcGASAs Gene Name | AcGASAs Gene ID | AtGASAs Gene ID               | Ka       | Ks       | Ka_Ks    | Selection Pressure  |
|-------------------|-----------------|-------------------------------|----------|----------|----------|---------------------|
| AcGASA11          | Aco000098.1.v3  | transcript:Vitvi18g00691_t001 | 0.399228 | 1.007563 | 0.396232 | Purifying selection |
| AcGASA11          | Aco000098.1.v3  | transcript:Vitvi03g00593_t001 | 0.370613 | 1.686225 | 0.219789 | Purifying selection |
| AcGASA4           | Aco001116.1.v3  | transcript:Vitvi14g03084_t001 | 0.22285  | 1.44002  | 0.154755 | Purifying selection |
| AcGASA4           | Aco001116.1.v3  | transcript:Vitvi17g00601_t001 | 0.203233 | 2.580314 | 0.078763 | Purifying selection |
| AcGASA9           | Aco004893.1.v3  | transcript:Vitvi18g00691_t001 | 0.307553 | 1.093605 | 0.281228 | Purifying selection |
| AcGASA9           | Aco004893.1.v3  | transcript:Vitvi03g00593_t001 | 0.349635 | 1.224639 | 0.285501 | Purifying selection |
| AcGASA9           | Aco004893.1.v3  | transcript:Vitvi07g01638_t001 | 0.330929 | 1.30681  | 0.253235 | Purifying selection |
| AcGASA6           | Aco000980.1.v3  | transcript:Vitvi01g00821_t001 | 0.1533   | 1.348021 | 0.113723 | Purifying selection |
| AcGASA6           | Aco000980.1.v3  | transcript:Vitvi14g01819_t001 | 0.268448 | NaN      | NaN      | NaN                 |
| AcGASA6           | Aco000980.1.v3  | transcript:Vitvi17g00750_t001 | 0.144844 | 0.867075 | 0.167049 | Purifying selection |
| AcGASA10          | Aco008536.1.v3  | transcript:Vitvi18g00691_t001 | 0.246023 | 1.237165 | 0.19886  | Purifying selection |
| AcGASA10          | Aco008536.1.v3  | transcript:Vitvi03g00593_t001 | 0.303005 | 1.265189 | 0.239494 | Purifying selection |
| AcGASA10          | Aco008536.1.v3  | transcript:Vitvi07g01638_t001 | 0.30053  | 1.435237 | 0.209394 | Purifying selection |
| AcGASA8           | Aco002373.1.v3  | transcript:Vitvi08g01686_t001 | 0.252713 | NaN      | NaN      | NaN                 |
| AcGASA13          | Aco015815.1.v3  | transcript:Vitvi07g01086_t001 | 0.396276 | NaN      | NaN      | NaN                 |
| AcGASA1           | Aco012370.1.v3  | transcript:Vitvi18g00691_t001 | 0.284223 | 1.443821 | 0.196855 | Purifying selection |
| AcGASA1           | Aco012370.1.v3  | transcript:Vitvi03g00593_t001 | 0.332918 | 1.224521 | 0.271876 | Purifying selection |
| AcGASA1           | Aco012370.1.v3  | transcript:Vitvi07g01638_t001 | 0.320309 | 1.687821 | 0.189777 | Purifying selection |

| One-to-one orthologous relationships between the GASA gene members in pineapple and Maize |                 |                      |          |          |          |                     |
|-------------------------------------------------------------------------------------------|-----------------|----------------------|----------|----------|----------|---------------------|
| AcGASAs Gene Name                                                                         | AcGASAs Gene ID | AtGASAs Gene ID      | Ka       | Ks       | Ka_Ks    | Selection Pressure  |
| AcGASA15                                                                                  | Aco010336       | Zm00001eb066440_P001 | 0.269409 | 0.836017 | 0.322253 | Purifying selection |
| AcGASA9                                                                                   | Aco004893       | Zm00001eb050180_P001 | 0.498117 | 0.731897 | 0.680584 | Purifying selection |

|          |           |                      |          |          |          |                     |
|----------|-----------|----------------------|----------|----------|----------|---------------------|
| AcGASA9  | Aco004893 | Zm00001eb214350_P001 | 0.313489 | 0.454405 | 0.689888 | Purifying selection |
| AcGASA2  | Aco011225 | Zm00001eb348690_P001 | 0.325702 | 1.346662 | 0.241859 | Purifying selection |
| AcGASA10 | Aco008536 | Zm00001eb214350_P001 | 0.291238 | 0.484199 | 0.601486 | Purifying selection |
