# Supplementary material for: Genome-Wide Identification and Characterization of Gibberellic Acid-Stimulated Arabidopsis Gene Family in Pineapple (Ananas comosus)
Source: MDPI journal article supplement (doi:10.3390/ijms242317063), 2023-12-02
Supplement: s1 [file s1]

**Table S2:** The GASA protein sequences of Pineapple, *Arabidopsis*, Maize, Tobacco, Grape, and Rice.

**Pineapple GASA proteins**

>AcGASA1

MKLLPYTLALILLLLLTSSYLQATMALSDFCNSKQCGRCAKAGKTGRCMRYCGMCCEQCK  
CVPSGTYG NKDECPCYRDMVSWKTKRPKCP\*

>AcGASA2

MANKARFLSPVLLLLLLLVEMNIFDGPLVQGVGIDCAAKCDYRCSKAGWHKACIRACNTC  
CERCHCVPPGTSGNKDVCPCYANMTTHGGRPKCP\*

>AcGASA3

MRDDCPAKCAYRCSKSGRPKMCLRACNTCCQRCHCVPPGTSGNTEKCPCWAHMKTHGG  
RPKCP\*

>AcGASA4

MAMAYKLFILVAFALLAISMAEDKVLAQGTDHVEGEYHLEGSNGQGLRSYQCPGQCSRR  
CAQTQYKKPCLFFCQKCCMKCLCVPSGYGNGKGEPCYNNWTKRGGPKCP\*

>AcGASA5

MVVAAGFSRFSCLLLLLLLALSFSESMGGNLNPSCNPRCSYRCSGTSHKKPCMSFCMQC  
CAQCLCVPPGTYG NRQVCACYNWTKRGGPKCP\*

>AcGASA6

MINCAGLCAGRCSQH SRPNLCARACGTCCSRCKCVPPGTSGNREMGTCYTNMTTHGN  
RTKCP\*

>AcGASA7

MALKLALFLLACFLLA STRVSSDSEEAFTAA MAPYVPATPPALAPAPHKIIDTKECVGACK  
ERCSLH SRKNVCSRA CLTCCSVCKCVPAGTAGNKETCGKCYTDWQTHGNRTKCP\*

>AcGASA8

MATTKQTKEAVHQTLHMDLERLLLQYLQQRANATRR AQKTTQQMFP EAQLRDNGMLIA  
KHCPSP TSQP PAISPTPQPIKFPMYGVTPGSLHPQEC PDRCAGRCSATAYKKPCMF FCQK  
CCEKCLCVPPGTYG NKQFCPCYNDWTKRGGPKCP\*

>AcGASA9

MKLLYTALPLLLLLLLLLLASDHFQATMAGSAFCNGKCKVRCSKASEQERCLKYCGLCCEE  
CRCVPPGTYG NKDRCPCYRDKFTGHGRRRRPKCP\*

>AcGASA10

MKPLYITTTTTLAFLLLLLLLASSYLQTS MAGSAFCDGKCKVRCSKASVQDRCLRYCGLCCA  
ECNCVPSGTYG NKDECPCYRDKYTG TGLRRRSKCP\*

>AcGASA11

MKLFSFSLALMMLLLASAYLQTFINASEWCEGKCSERCSKAGARRRCVEYCNLCCKE CNC  
VPSGTAGNKDECPCYRDKRNSK GKPKCP\*

>AcGASA12

MDSGRNKKLVSWFIVLFLFMQVVAEASLHNFIGLEDDKEGNATPADGFSRRPIINCNFACA  
RRCMKASRKNVCARACGTCCIKCQCVAGTSGNKTMCPCYANLRTHGLKPKCP\*

>AcGASA13

MNRDRSPKISKPNRNSLA EIIGGANASHYLP AEKAQFLQKYRCSATSHKKPCLFFCNECCQ  
KCHCVPSGTYG HKEEPCYNNWTKEGKPKCP\*

>AcGASA14

MATTQLILLTLLAFSFTLHHLAVEAHEEVEHQLASKGARTLLATMDCNSACSGRCQLSSR  
LNYCMRACKTCCARCSCVPPGTSGNYDQCPCYASLTTRSSKKKCP\*

>AcGASA15

MNEGSAIDCGGACAERCKESSRPNLCKRACGTCCRRCSVPPGTYGNYEVCPCYAAITTR  
GGRKKCP\*

### ***Arabidopsis thaliana* GASA proteins**

>AtSA1

MAISKALIASLLISLLVLQLVQADVENSQKKNGYAKKIDCGSACVARCRLSRRPRLCHRACTCCYRCNCVP  
PGTYGNYDKCQCYASLTTHGGRRKCP

>AtSA2

MAVFRSTLVLLLIIVCLTTYELHVHAADGAKVGEGVVKIDCGGRCKDRCSKSSRTLCLRACNSCCSRCNCV  
PPGTSGNTHLCPCYASITTHGGRLKCP

>AtSA3

MAIFRSTLVLLILFCLTTFELHVHAAEDSQVGEGVVKIDCGGRCKGRCSKSSRPNLCLRACNSCCYRCNCV  
PPGTAGNHHLCPCYASITTRGGRLKCP

>AtSA4

MAKSYGAIFLLTLIVLFMLQTMVMASGSGSNVKSQKRYGPGSLKRTQCPSECDRRCKKTQYHKACITFCN  
KCCRKCLCVPPGYGNKQVCSCYNNWKTQEGGPKCP

>AtSA5

MANCIRRNALFFLTLLFLLSVSNLVQAARGGGKLPQQCNSKCSFRCSATSHKKPCMFFCLKCKKCLCV  
PGTFGNKQTCPCYNNWKTKEGRPKCP

>AtSA6

MAKLITSFLLLTILFTFVCLTMSKEAEYHPESYGPSLSYQCGGQCTRRCSNTKYHKPCMFFCQKCCAKCL  
CVPPGTYGNNKQVCPCYNNWKTQGGGPKCP

>AtSA7

MKIIVSILVLASLLLISSSLASATISDAFGSGAVAPAPQSKDGPALKWCGQKCEGRCKEAGMKDRCLKYCGI  
CCKDCQCVPSGTYGNNKHECACYRDKLSSKGTPKCP

>AtSA8

MKLVVVQFFIISLLLTSSFSVLSSADSSCGGKCNVRCSKAGQHEECLKYCNICQKCNVPSGTFGHKDECP  
CYRDMKNSKGGSKCP

>AtSA9

MKKMNVVAFVTLIISFLLLSQVLAELSSSSNNETSSVSQTNDENQTAAFKRTYHHRPRINCGRHACARRCSKT  
SRKKVCHRACTCCAKCQCVPPGTSGNTASCPCYASIRTHGNKLKCP

>AtSA10

MKFPVAVKVLIIISLLITSSLFILSTADSSPCGGKCNVRCSKAGRQDRCLKYCNICCEKCNVPSGTYGNNKDEC  
PCYRDMKNSKGTSKCP

>AtSA11

MAVFRVLLASLLISLLVLDFVHADMTSNDAPKIDCNSRCQERCSLSSRPNLCHRACTCCARCNCVAPG  
TSGNYDKCPCYGLTTHGGRRKCP

>AtSA12

MMKLIVVFVISSLLFATQFSNGDELESQAQAPAIHKNNGGEGSLKPEECPKACEYRCSATSHRKPCLFFCNKC  
CNKCLCVPSGTYGHKEECPCYNNWTTKEGGPKCP

>AtSA13

MALSLLSVFIFHHVFTNVVFAASNEESNALVSLPTPTLPSPSPATKPPSPALKPPTPSYKPPTLPPTPIKPPTTKP  
PVKPPTIPVTPVKPPVSTPPIKLPPVQPPTYKPPTPTVKPPSVQPPTYKPPTPTVKPPTTSPVKPPTTPPVQSPP  
VQPPTYKPPTSPVKPPTTTPPVKPPTTTPPVQPPTYNPPTTPVKPPTAPPVKPPTPPPVRTRIDCVPLCGTRC  
GQHSRKNVCMRACVTCCYRCKCVPPGTYGNKEKCGSCYANMKTRGGKSKCP  
>AtSA14  
MKMPVVVVQFFIISLLLTSSFYVLSSADSSACGGKCSVRCSKADRTHEECLEDCDICCQKNCNCPVSGTYGNKD  
ECPCYRDMKNKSGGSKCP  
>AtSA15  
MATKLSIIVFSIVVLHLLLSAHMHFLINVCAECETKSAIPPLLECGPRCGDRCSNTQYKKPCLFFCNKCCNKCL  
CVPPGTYGNKQVCPCYNNWTKSGGPKCP

### **Maize GASA proteins**

>ZmGASA1  
MTMTTMKKQQQLLLLLSLMFLVAVTAAAVAADPHPQQVQVQQQQQAQMRINRATRSL  
LPQ  
PPPKLDCPSTCSVRGNNWKNQMCNKM CNVCCNKCSCVPPGTGQDTRHLCPCYDTML  
NPH  
TGKLKCP\*  
>ZmGASA2  
MAQASSFSIVLLFLALVLVVEVSAGTANEELYRPAGAEGSVPIEQCPEKCDYRCSATSY  
KKPCLFFCNKYCCNKCLCVPSGTYGNKEECPCYDNMKTQGGPKCP\*  
>ZmGASA3  
MCMCSAATLPCCHVGRHGHQLHCTAPPHSYIVYCCCAHSLYICITACFWNQERRSPLHSR  
RHPPLPLL FLEMTMTTMKKQQQLLLLLSLMFLVAVTAAAVAADPHPQQVQVQQQQQAQ  
M  
RINRATRSLLPQPPPKLDCPSTCSVRGNNWKNQMCNKM CNVCCNKCSCVPPGTGQDTR  
H  
LCPCYDTMLNPHTGKLKCP\*  
>ZmGASA4  
MAKPPLQTAAILLVLLAAASCLHTVDAATLGFCWGKCSVR CAGATARQARAACMSSCGL  
CCEACNCVPHDIHDCPCYRNMLTAGPKKRPKCP\*  
>ZmGASA5  
MAAASGRAPSACALLLLFLLLVVGAAAAAVIVVDANRGEQE QDWDWEQLSAA SPSPWSP  
A  
PAPAPSPVSFIDCGSACGAR CALSSRWNL CRRACGSCC ARCN CVPPGTAGNH DVCPCYAA  
ITTRGGRPKCP\*  
>ZmGASA6  
MAMAKPPLQTVTIILLVLLTAASWLHTVDASALGFCWGKCSVR CVQATAGQARAACMS  
Y  
GLCKACNCVPHDIHDCPCYRNMP TVDPKKRPKCP\*  
>ZmGASA7  
MAKASSRLLFSLSLVLLLLVETTTSPHGQADAIDCGASCSYRCSKSGRPKMCLRACGTC  
CQRGCVPPGTSGNEDVCPCYANMKTHDGQHKCP\*  
>ZmGASA8

MAVAKPPLQTA AVL L L L L L L V V A A S W L Q T V D A A S G F C S S K C S V R C G R A A S A R A R G A C M R S  
C G L C C E E C N C V P T R P P R D V N E C P C Y R D M L T A G P R K R P K C P \*

>ZmGASA9

MAKPPLQTAAI L L L L L L A A S C L H T V D A A A L G F C W G K C S V R C A G A T A R Q A R A A C M S S C G  
L  
C C E A C N C V P R D I H D C P C Y R N M L T A G P K K R P K C P \*

>ZmGASA10

MRINRATRSLPQ P P P K L G T T E N C R Q Q D T R S H F I D A C F S R N T D C P S T C S V R C G N N W K N Q M  
C N K M C N V C C N K C S C V P P G T G Q D T R H L C P C Y D T M L N P H T G K L K C P \*

>ZmGASA11

MTMTTMKKQ Q Q L L L L L S L M F L V A V T A A A V A A D P H P Q Q V Q V Q V Q Q Q Q A Q M R I N R A T R S  
L L  
P Q P P P K L D C P S T C S V R C G N N W K N Q M C N K M C N V C C N K C S C V P P G T G Q D T R H L C P C Y D T  
M L N P H T G K L K C P \*

>ZmGASA12

MTMTTMKKQ Q Q L L L L L S L M F L V A V T A A A V A A D P H P Q Q V V Q V Q Q Q Q A Q M R I N R A T R S L  
L P  
Q P P P K L D C P S T C S V R C G N N W K N Q M C N K M C N V C C N K C S C V P P G T G Q D T R H L C P C Y D T M  
L N P  
H T G K L K C P \*

>ZmGASA13

MTMTTMKKQ Q Q L L L L L S L M F L V A V T A A A V A A D P H P Q Q V Q V Q V Q Q Q Q A Q M R I N R A T R S  
L L  
P Q P P P K L G T T E N C R Q Q D T R S H F I D A C F S R N T D C P S T C S V R C G N N W K N Q M C N K M C N V C C  
N K  
C S C V P P G T G Q D T R H L C P C Y D T M L N P H T G K L K C P \*

>ZmGASA14

MASRNKAAALLCFLFLA A V A A S A A E M I A G S G I G D G E G E E L D K G G G G G G G H H K H E G Y K  
N K  
D G K G N L K P S Q C G G E C R R R C S K T H H K P C L F F C N K C C A K C L C V P P G T Y G N K E T C P C Y N N W  
K  
T K K G G P K C P \*

>ZmGASA15

MKPAATARVAGLLFFLV L L L A L P S L R V S M A G S G F C D G K C A V R C S K A S R H D D C L K Y C G I C C  
A T C N C V P S G T A G N K D E C P C Y R D M T T G H G N R T R P K C P \*

>ZmGASA16

MAPSKLAVVVALVAS L L L L T S N T K L G L F V L G Q A A P G A Y P P R A P P P H Q I V D L A K D C G G A C  
D V R C G A H S R K N I C T R A C L K C C G V C R C V P A G T A G N Q Q T C G K C Y D W T T H G N K T K C P \*

>ZmGASA17

MAKPPLQTATI L L L L L V A A S C L H T V D A A A L G F S W G K C C V R C A R T T T R R A R E A C M S S C G L  
K C E F C K C G P A M P P R D I H D C P C Y R N M L T A S P K K R P K Y P \*

>ZmGASA18

MASRNKAAALLCFLFLA A V A A S A A E M I A G S G I G D G E G E E L D K G G G G G G G H H K H E G Y K  
N K

DGKGNLKP SQCGGECRRRCSKTHHKPCLFFCNKCCAKCLCVPPGTYGNKETCPCYNNW  
KTKKG GPKCP\*

### **Tobacco GASA proteins**

>NtGASA1

MKSNPFKLIK YFMKSNFIDLHYFIHMKILNFSCYTSNAISEAAYSYPKIDCGGACKARCRLSS  
RPRLCKRACGTCCARCNCVPPGTSG>NtETCPCYANMTTHGNRRKCP

>NtGASA2

MAISKTLFVSLVLSLLLLDQVQSIQTDQVTSNAISEAAYSYPKIDCGGACKARCRLSSRPRLC  
KRACGTCCARCNCVPPGTSG>NtETCPCYANMTTHGNRRKCP

>NtGASA3

MAISKLILVAMVFFSLLVLHLVEADNQLVV>NtDATESFYTPKLDCGAACEARCLASRQKIC  
KRACGTCCGRCNCVPPGTSGNQELCPCYFAMTTHGGKRKCP

>NtGASA4

MAISKLILVAMVFFSLLVVHLVEADNQVVVNKD ATKSSYTPKLDCGAACEARCLASRQKI  
CKRACGTCCARCNCAPPGTSGNLELCPCYFAMTTHGGKRKCP

>NtGASA5

MDISKSKALIVSLIFLLFLLSAAENHELSSNNIDAISKALKARPNYTINCGKECTRRCKLASR  
QKMCMRACGTCCARCNCVPPGTSGNENICPCYSTMTTHGNRRKCP

>NtGASA6

MPIKRPALPHFNHILNPQENMKFFTLVFIAILLIQVFTEAVSINNAEDTAAQIEKAGNDGAL  
FKKSHHHPIRKINCGYACARRCRKSSRKNVCKRACKSCCARCHCVPRGTYGNKEACPCYA  
RLKTHGNRPKCP

>NtGASA7

MKIFTLVFIAILLIQVFAEAVSFNNAEDTAAQIEKAGNEGTLFKKIHHPIRKINCGHACARR  
CRKSSRKNVCKRACKSCCARCHCVPPGTYGNKEACPCYARLKTHGNRPKCP

>NtGASA8

MAFQKAFAALLIASLVLVHFTHALQQGNNSKPPAPSPQAPKPLGNITFTTYIFPPRLIYNHITI  
ILNSLTNLSEFDYVADCTGACEYRCSESRPNLCNRACGSCCRTCHCVPPGTSGNYEACPCY  
FNLTHNDTRKCP

>NtGASA9

MAMAIRLVFVMALLLFLGVKAEVSLTDPKVEEDKSQHFGLSQAFRVFTRGANRRLVQGV  
VLKLVKYLNNGDLAVAPAPAPHPSQLDCGGLCKYRCSLHSRPKVCIRACGTCCLRCKCVPP  
GTFGNREMCGKCYTEMTHGNKTKCP

>NtGASA10

ARQHFDASFLAKPPVGPTTCPVPTAQCSSACDQRCSATSHKNNCLMFCNMCCNWCQCVP  
PGTFGQKECCSCYNDWKTEQGTPKCP

>NtGASA11

MAHSSLFECSSACDQRCSATSHKNNCLMFCNICCNWCQCVP PGTFGQKECCSCYNDWKT  
EQGTPKCP

>NtGASA12

MAYNARLLFLSMFLVLITFSNVVEGYKKLRPEDCEPKCKYRCSATSHKKPCLFFCKKCCAKC  
LCVPPGTHGNKETCPCYNNWKTKEGGPKCP

>NtGASA13

MEKMPCLMLLPLLIIMLLLVGTHAKITESAPQPQPP>NtFPMNGTTPGSLHPQECLPRCTYR

CSKTQYKKPCMFFCQKCCAKCFCVPPGTYGNKQFCPCYNNWTKRGGPKCP  
>NtGASA14  
MKLCFATLLVVTLVLTSSFIQTTVAGSDFCDKCKIRCSKAGRQDRCLKYCGICCNQCQVPS  
GTYGNKDECPCYRDKKNSKGKPKCP  
>NtGASA15  
MKLLLATLLLFTLVLTSPFIQTTMAGSSYCDKCKLRCAKAGVMDRCLKYCGICCEECKCVP  
SGTYGNKHECPCYRDKKNNKGKPKCP  
>NtGASA16  
MKRIFVAFMLVFALLLTSSFLETATAKSVYCARKCKARCSKAGVKDRCVKYCELCCAKCKC  
VPTGTYGNKHQCPCYRDMKNFKGKPKCP  
>NtGASA17  
SCDSKCAVRRGKAGIAKRCLTYCGIYCNKCNVPSGNYGNKSECPCYRDMLNSKGKSKCP  
>NtGASA18  
MKLAMITLLIVSLVLTSSFLQSAVAYDDPSSCDKCAVRCGKAGIKKRCLTYCGICCNKCN  
VPSGNYGNKSECHCYRDMLNSKGKSKCP

### **Grape GASA proteins**

>VvGASA1  
MGIRVLLLVTIMLFCAIEASSDDNNIFEHQHNQAVKGSAGRLLPFLDCGGLCKERC SLHSR  
PNVCTRACGTCCVRCKCVPPGTYGNREMCCTCYTEMTHGNKPKCP  
>VvGASA2  
MKHLFPTLLLLSLLHSCFSQPTTDGAGFCGLKCSKRC SQA AVLDRCMKYCGICCQECKCV  
PSGTYGNKHECPCYRDKKNSKGKPKCP  
>VvGASA3  
MPAPMKGFCDKCGVRCANAGVYDRCVKYCGICCQECKCVPSGTYGNKSECPCYRDKLN  
SKGKPKCP  
>VvGASA4  
MLSLSMMLLLLQNNATITEAPTPQPQQSTNGFPMHGV TQGS LHPQECAPRCTTRCSKTA  
YKKPCMFFCQKCCAKCLCVPPGTYGNKQFCPCYNNWTKRGGPKCP  
>VvGASA5  
MDLFIGHLTEFHGNLSSILDILEREKQVKTELHRYLSPILNHILERGVNYLQLLTPGLFFSP  
CSAMALKILLLLLASYLLVTKRVSANDEEFGVQATYAKAPVPAPVKTPIPAPPVKPPTVTPNP  
PAP>VvKPPT>VvPKPPAPPVSPPTVAPKPPAP>VvPKPPTPPANPPTVAPKPPAPPVKPPT>Vv  
PKPPSPPPVNPPTPKPPASPVKPPTVAPKPPVPPVTPPTAPMPPVRARLDCIPLCDQRCKAHS  
RKNICVRACMTCCDRCKCVPPGTYGNREKCGKCYTDMTHGNKPKCP  
>VvGASA6  
MAKVFAFLLLALLAISMLHTTVLASHGHGGHHYDQKNYGPSLKS FQCPSQCSRRCGKTQ  
YHKPCMFFCQKCKKCLCVPPGYGNKAVCPCYNNWKTKEGGPKCP  
>VvGASA7  
MAKLVLPLLLALFSISMVATKVMMAKEAQYHLDSGSYGPSLKS NQCPSQCTRRCSKTQYHK  
PCMFFCQKCCAKCLCVPPGYGNKAVCPCYNNWKTKEGGPKCP  
>VvGASA8  
MATLRLLLVFVALLVFLAQISSDFNIEGEEMPVFSQ>VvVRGGNRRMLQDIDCGGLCKDRCS  
LHSRPNVCVRACGTCCVRCKCVPPGTSGNREL CGKCYTDMTHGNKTKCP

>VvGASA9

MKPLLATFLLVFLVLSSSFVQNAMAGSSFCDISKCAARCSKAGMKDRCLKYCGICCEECKCV  
PSGTYGNKHECPCYKDKKNSKGQPKCP

>VvGASA10

MAISKTLIASLLISLLVYQITEAATTSGDGASSPTEKMDCGGAC SARCLSSRPNL CNRACGT  
CCARCNCVPPGTSGNQEICPCYANMTTRGNERKCP

>VvGASA11

MKLFSVFIISILLQAF AEASLVISNAEHSLSVDES RDEVALHKKSHPRKINCSYACSRRCRK  
ASRKNVCS RACKTCCRCHCVPPGT YGNKNMCPCYASLKTHGHKPKCP

>VvGASA12

MQVLFNSIKLYKLS DCKSKCAYRCSKAGWHKLCLRACNTCCERCNCVPPGTAGNEDVCP  
CYAKMTTHGGRHKCP

>VvGASA13

MTYIYFLVSKYRCS DTQYRNACLEFCNLCKKCLCVPSGTYGHKEECPCYNNWKTKEGG  
PKCP

>VvGASA14

MWVLGCKFLTYISKKK VSKMAQSSNLQSIFLLLLVAFMLLDV SIVKCPKACNYRCS DTQYL  
NACLEFCNLCCQKCLCVPSGTYGHKEECPCYNNWKTKEGGPKCP

#### **Rice GASA proteins**

>OsGASA1

MKTRRAALLMLLLL VVAAASWPQPCDAASGFCGSKCAVRCGRGRGRSGCLRSCGLCC  
EECNCVPTGSGSTRDECPCYRDMLTAGPRKRPKCP

>OsGASA2

MKLNTTTTLALLLLLL ASSSLQVSMAGSDFCDGKCKVRCSKASRHDDCLKYCGVCCASC  
NCVPSGTAGNKDECPCYRDMTTGHGARKRPKCP

>OsGASA3

MAPGKLAVFALLAS LLLLNTIKAADYPPAPPLGPPPHKIVDPGKDCVGACDARCSEHSHK  
KRCRSCLTCCSACRCVPAGTAGNRETCGRCYTDWVSHNNMTKCP

>OsGASA4

MEGVGVGV RIRALLCCIAMAA MLLSSYQQGQAEASYMPWP PATPPPPAAAAANSTSTAA  
ANNSSSSSSTAPPQQPTAFPMYGVTPGSLRPQECGGRCAYRCSATAYRKPCMFFCQKCCAS  
CLCVLPGT YGNKQSCPCYNDWKT KRGGPKCP

>OsGASA5

MASMAKSLLCISLVA ILLLVETTAPHGQAY AIDCGAKCGYRCSKSGRPKMCLRACGTCCQR  
CGCVPPGTSGNENVCPCYANMTTHNGRHKCP

>OsGASA6

MASSTKIPFLLLAV LLLLSIAFPSEVMAGGRGRGGGGGGVAGGGNLRPWECSPKCAGRCS  
NTQYKKACLTF CNKCCAKCLCVPPGT YGNKGACPCYNNWKTKEGGPKCP

>OsGASA7

MASSGSKSKTNNGFFV P SPATAMAPCFLLLLIFFFLHVDASAAA SSSSHPQLQVQQMQVK  
RARSLLQAPKIDCQGTCSGRCAN NWKKEMCNKMCNVCCNRCNCVPPGSGQDTRHLCPC  
YDTMVNPHNGK LKCP

>OsGASA8

MRVPPLRATTALLATLLVAASFQDLTVAADGGGGVVPVPSVCDAKCQKRCSLKVAGRCM  
GLCKMCCHDCGGCVPSGPYASKDECPCYRDMVSPKSRRPKCP

>OsGASA9

MALAGRLLVLFAIALLAISIAEHKALAKGSTSEHDDNVYQVSKGGQGSLSYQCSPQCAYR  
CSQTQYKKPCLFFCNKCCNACLCVPSGLYGNKGECPCYNNWTKRGGPKCP

>OsGASA10

MDPASRSLSIIFFLVAVTFVVEVSGQKNEAVYHLFGGEGSLTKNECPGKCSYRCSATSHTTVC  
MTYCNYYCCERCLCVPSGT
