# Supplementary material for: Genome-Wide Identification and Characterization of Gibberellic Acid-Stimulated Arabidopsis Gene Family in Pineapple (Ananas comosus)
Source: MDPI journal article supplement (doi:10.3390/ijms242317063), 2023-12-02
Supplement: s1 [file s1]

**Table S1:** Physicochemical properties of *AcGASA* family genes. Each gene is presented with its respective Gene ID, Chromosomal locations, length of coding region (CDS), Protein length (PL), Molecular weights of amino acid (MW), Isoelectric points (pI), Hydrophilicity score (GRAVY), Aliphatic index (AI), and predicted subcellular location.

| Gene name       | Gene ID   | Chr location           | CDS (bp) | PL (aa) | MW (kDa) | pI   | GRAVY  | AI    | Subcellular localization        |
|-----------------|-----------|------------------------|----------|---------|----------|------|--------|-------|---------------------------------|
| <i>AcGASA1</i>  | Aco012370 | LG01:2575624-2576905   | 273      | 90      | 10.08    | 9.07 | -0.149 | 64.00 | Cell membrane, Golgi, Nucleus   |
| <i>AcGASA2</i>  | Aco011225 | LG01:13308868-13310528 | 285      | 94      | 10.17    | 8.48 | 0.007  | 72.66 | Golgi                           |
| <i>AcGASA3</i>  | Aco011224 | LG01:13310793-13311280 | 192      | 63      | 6.96     | 9.16 | -0.805 | 17.14 | Golgi, Nucleus                  |
| <i>AcGASA4</i>  | Aco001116 | LG02:14120832-14122260 | 336      | 111     | 12.35    | 8.84 | -0.307 | 56.31 | Golgi                           |
| <i>AcGASA5</i>  | Aco001067 | LG02:14490031-14490928 | 288      | 95      | 10.3     | 8.98 | 0.014  | 58.53 | Cell membrane, Golgi, Nucleus   |
| <i>AcGASA6</i>  | Aco000980 | LG02:15218075-15218487 | 192      | 63      | 6.67     | 8.96 | -0.398 | 29.52 | Golgi, Nucleus                  |
| <i>AcGASA7</i>  | Aco000979 | LG02:15218868-15219954 | 351      | 116     | 12.37    | 8.59 | 0.011  | 69.14 | Cell wall                       |
| <i>AcGASA8</i>  | Aco002373 | LG04:2068331-2070499   | 468      | 155     | 17.39    | 9.25 | -0.691 | 45.42 | Nucleus                         |
| <i>AcGASA9</i>  | Aco004893 | LG07:593092-593647     | 288      | 95      | 10.72    | 9.20 | -0.229 | 74.00 | Cell membrane, Golgi, Nucleus   |
| <i>AcGASA10</i> | Aco008536 | LG09:569695-571352     | 294      | 97      | 10.69    | 8.98 | -0.070 | 71.44 | Cell membrane, Cell wall, Golgi |
| <i>AcGASA11</i> | Aco000098 | LG12:4718773-4719394   | 267      | 88      | 9.85     | 8.88 | -0.365 | 54.43 | Golgi                           |
| <i>AcGASA12</i> | Aco003244 | LG17:1390314-1391450   | 345      | 114     | 12.51    | 9.23 | -0.104 | 65.96 | Golgi                           |
| <i>AcGASA13</i> | Aco015815 | LG17:5770304-5771114   | 282      | 93      | 10.54    | 9.17 | -0.932 | 38.92 | Golgi, Nucleus                  |
| <i>AcGASA14</i> | Aco015632 | LG19:1022203-1025827   | 321      | 106     | 11.52    | 8.65 | -0.010 | 73.77 | Nucleus                         |
| <i>AcGASA15</i> | Aco010336 | LG25:1950442-1951286   | 204      | 67      | 7.12     | 8.79 | -0.482 | 35.07 | Golgi, Nucleus                  |
