# Supplementary material for: Genome-Wide Identification and Characterization of Gibberellic Acid-Stimulated Arabidopsis Gene Family in Pineapple (Ananas comosus)
Source: MDPI journal article supplement (doi:10.3390/ijms242317063), 2023-12-02
Supplement: s1 [file s1]

**Table S12:** The primers of AcGASA genes and  $\beta$ -actin gene used in the qRT-PCR assays.

| Gene           | Primer | Sequence                |
|----------------|--------|-------------------------|
| AcGASA1        | F      | CGTCGAGTACTGCAACCTGT    |
|                | R      | GGTTTACCCCTGCTGTTGCG    |
| AcGASA2        | F      | GTGTTGGCTCAGGGAACAGA    |
|                | R      | GGGGCATTGATAGCTTCGGA    |
| AcGASA3        | F      | TGAATGAAGGGTCTGCAATAGA  |
|                | R      | AAGGGCAGACCTCGTAGTTG    |
| AcGASA4        | F      | TGATTGTCCTGCAAAGTGCG    |
|                | R      | TCTGTGTTCCCAGAGGTTCC    |
| AcGASA5        | F      | GCTCCTGCACCTCACAAAAT    |
|                | R      | TGGGTCTGCCAATCAGTGTA    |
| AcGASA6        | F      | AGCTCCTCTACACCGCGTTA    |
|                | R      | ACCTGTCCTTGTTGCCGTAG    |
| AcGASA7        | F      | CAAAGTGCGACTACCGATGC    |
|                | R      | AGCATAGCAAGGGCAGACAT    |
| AcGASA8        | F      | CCTGTAAAACGTGCTGTGCG    |
|                | R      | GCAGGGGCACTGATCGTAAT    |
| AcGASA9        | F      | ATAAACTGTGCGGGGCTGT     |
|                | R      | TAAGGGCACTTGGTCCTGTT    |
| AcGASA10       | F      | CTGGCTCAGCATTTTGCGAC    |
|                | R      | CGGTGTA CTGTGCGGGTAG    |
| AcGASA11       | F      | AAGCAGTGCACCAGACACTT    |
|                | R      | TTGATAGGCTGCGGAGTTGG    |
| AcGASA12       | F      | GAAGGCTCAGTTCCTCCAGA    |
|                | R      | CCTCCTTCGTCTTCCAGTTG    |
| AcGASA13       | F      | TCCCGGAGACCAATAATCAA    |
|                | R      | GCACTTGGGTTTGAGTCCAT    |
| AcGASA14       | F      | GGAGGGAATCTCAACCCTTC    |
|                | R      | ACCCCTCTTGGTCTTCCAGT    |
| AcGASA15       | F      | CACCTTGGCCCTCATACTGC    |
|                | R      | ATGCATCGCCCTGTCTTCC     |
| $\beta$ -actin | F      | CTGGCCTACGTGGCACTTGACT  |
|                | R      | CACTTCTGGGCAGCGGAACCTTT |
