# Supplementary material for: Genome-Wide Identification and Characterization of Gibberellic Acid-Stimulated Arabidopsis Gene Family in Pineapple (Ananas comosus)
Source: Int J Mol Sci. 2023 Dec 2;24(23):17063. doi: 10.3390/ijms242317063 (PMC10706908; doi:10.3390/ijms242317063)
Supplement: Supplementary file 1 [file ijms-24-17063-s001.zip › Table S6.xlsx]

## Sheet: Sheet1
Table S6: Raw data on expression of pineapple at different tissue sites
AcGASAs gene id	AcGASAs gene name	Bract-1	Bract-2	Bract-3	Sepal-1	Sepal-2	Sepal-3	Flower disc-1	Flower disc-2	Flower disc-3	Receptacle-1	Receptacle-2	Receptacle-3	Ovary wall-1	Ovary wall-2	Ovary wall-3	Placenta-1	Placenta-2	Placenta-3	Ovule-1	Ovule-2	Ovule-3	Stamen	Style	Core-1	Core-2	Core-3	Petal	Stem-1	Stem-2	Stem-3	Leaf-1	Leaf-2	Leaf-3	Root-1	Root-2	Root-3
Aco012370	AcGASA1	21.3821	11.6916	0.110843	43.7394	18.5511	1.5736	60.3847	3.82009	0.124406	12.4565	4.9768	0	7.99587	4.44937	0	17.5956	2.72782	0.331325	16.0727	1.62939	0	4.20783	36.3732	0	0.457379	0	36.3406	0.908875	0.472254	0.547947	0.28092	0	0	1.88944	2.03861	1.59283
Aco011225	AcGASA2	1.65952	0.293213	0.817265	0.64707	0.610629	0.1275	0.650681	0.6438	1.44143	0.7904	0.73146	1.2028	0.138068	0.781097	1.83841	0.132383	0.52241	1.04697	0	4.71971	0.524624	279.543	0.152033	7.18166	2.08764	3.01459	0.279402	4.14843	8.78796	6.92592	0.887692	1.06652	1.11194	31.9672	15.6626	28.909
Aco011224	AcGASA3	0.382627	0	0	0	0	0	0	0	0	0	0.787029	0	0	0	0	0	0	0	0	0	0	15.8395	0	0	1.03673	0	0	0	0	0	0	0	0	1.60603	0.815443	0.833173
Aco001116	AcGASA4	3.58106	0.369086	0.0979759	9.12251	1.02485	0.320985	48.7338	1.08053	0.879721	17.9087	1.53456	0.0917602	11.8181	0	0	5.55466	0	0.0976214	29.1888	0.360061	0.110063	12.7521	100.918	3.08684	2.15619	0	146.074	1.87453	0.278289	0.24217	0	0.335626	0	1.46135	4.45191	1.73284
Aco001067	AcGASA5	4.54298	1.36672	0.604672	8.17703	2.37189	1.32067	8.25637	0.166715	0.271466	3.76608	0.378831	0.339787	0.858084	0	0.292963	0	0.135281	0.120497	0.797092	0.148145	0	2.62339	17.4802	0	0	0	19.2458	0	0.17175	0.149459	0	0.276182	0	1.03073	1.8317	1.06945
Aco000980	AcGASA6	10.3309	18.456	12.8134	16.7094	21.1888	21.401	37.8061	12.9883	79.9436	51.537	54.6985	97.0631	27.186	34.7941	60.7115	23.5027	30.3532	22.9056	13.9102	6.46324	8.04382	2.0438	2.94449	65.5874	89.6768	22.0815	7.21507	569.622	209.807	199.809	0	0.43033	0	1.20452	1.63089	0.833173
Aco000979	AcGASA7	0	0	0	0	0	0	0	0	0	0	0	0.178345	0	0	0.115326	0	0	0	0	0	0	0	0	0.142847	0	0	0	0.130119	0	0.11767	0	0	0	0	0	0
Aco002373	AcGASA8	5.36146	0.414439	0	5.67049	0.215772	0	4.13865	0	0	2.68124	0.172313	0	0.195151	0	0	1.1227	0	0	10.4417	0	0	2.68483	11.1743	0	0	0	0.987297	0.225522	0.468727	0	0	0	0	0	0	0
Aco004893	AcGASA9	0.425141	0.262907	0.20937	1.8566	0.547515	0.457286	8.75141	0.288629	0	9.07143	0.218619	0	4.45672	0	0	11.1578	0	0	4.96792	0.512955	0	0.851584	3.81694	3.45527	0.28798	0	1.75366	3.43353	5.64956	2.07002	0.265314	0.239072	0	1.56141	0.906048	1.38862
Aco008536	AcGASA10	45.1949	26.1271	2.40077	109.328	56.1112	6.11748	428.994	48.9547	15.7182	68.9397	34.5734	11.1486	206.071	45.2404	21.2036	314.98	29.5413	11.0634	36.1309	15.9301	3.70831	72.1513	180.671	76.5395	68.7951	8.74202	296.842	95.4202	66.4864	56.6208	0.253522	0.114223	0.0952696	13.5347	12.5538	12.0527
Aco000098	AcGASA11	0	0	0	0.309701	0	0	0	0	0	0	0	0	0	0	0	0	0	0	0	0	0	0.757616	0	0	0	0	0	0	0	0	0	0	0	0	0	0
Aco003244	AcGASA12	8.49474	3.04129	1.76144	10.4945	3.16681	0.240448	5.82872	0.910593	0.247123	2.38495	0	0	1.82265	0.294609	0	0.998631	0.492598	0.219383	0	0.26972	0	26.8666	17.4896	0	0.302848	0	3.68841	0.3009	1.56349	0.544224	2.51111	0.502831	0	0	0	0
Aco015815	AcGASA13	0.269721	0	0	0.29447	0	0.290114	0.740283	0	0	0	0	0	0.314162	0.710926	0.321779	0.301226	1.1887	0	2.45138	3.57976	0.596867	0.720356	1.38375	0	0	0	1.58939	0	0	0	0.336644	0.303347	0.253011	0.849088	0.28741	0.293659
Aco015632	AcGASA14	0.832008	0	0.512175	0.340632	0.535748	0.783052	1.42722	3.38911	2.2994	0.970863	2.67401	1.63092	5.45117	3.83774	8.43704	5.22672	14.0942	15.922	7.02166	13.1757	25.0858	0.833282	0.933726	1.38314	10.5671	2.95009	0.857987	2.79978	7.85577	6.0766	0.129806	0.350901	0.390232	2.29179	3.98959	2.60432
Aco010336	AcGASA15	1.01249	1.09571	1.24655	1.24357	0.651964	1.7697	0.347364	15.8098	27.7021	0.337562	0.780975	22.9992	2.21122	22.1836	41.8238	0.141345	85.3392	48.5639	1.97188	1048.92	154.458	3.38013	1.78557	6.54569	1.88604	29.3393	0.596631	10.3917	3.89476	18.3328	0.947782	0	0	186.061	46.2576	218.679
