# Supplementary material for: Genome-Wide Identification and Characterization of Gibberellic Acid-Stimulated Arabidopsis Gene Family in Pineapple (Ananas comosus)
Source: Int J Mol Sci. 2023 Dec 2;24(23):17063. doi: 10.3390/ijms242317063 (PMC10706908; doi:10.3390/ijms242317063)
Supplement: Supplementary file 1 [file ijms-24-17063-s001.zip › Table S7.xlsx]

## Sheet: Sheet1
Table S7: Pineapple flower tube tissue expression raw data
AcGASAs gene id	AcGASAs gene name	Gynoecium-1	Gynoecium-2	Gynoecium-3	Gynoecium-4	Gynoecium-5	Gynoecium-6	Gynoecium-7	Ovule-1	Ovule-2	Ovule-3	Ovule-4	Ovule-5	Ovule-6	Ovule-7	Petal-1	Petal-2	Petal-3	Sepal-1	Sepal-2	Sepal-3	Sepal-4	Stamen-1	Stamen-2	Stamen-3	Stamen-4	Stamen-5	Stamen-6
Aco012370	AcGASA1	181.113	162.827	239.635	126.569	92.5179	48.7321	92.9268	152.269	193.765	181.862	273.66	229.227	92.9177	226.546	96.0328	35.442	0.511356	131.272	76.5892	40.3548	89.0151	72.7977	54.4777	80.0091	43.1899	54.9764	13.3328
Aco011225	AcGASA2	5.10855	89.2395	5.91343	1027.96	0.939552	2.24237	0.654324	0.165722	0.407735	0.136951	0.939508	0.487989	0.475609	0.208299	14.5011	1.17119	41.7789	2.81545	1.26213	1.46677	1.50549	0.313427	0.260256	0.544329	3.79287	2.10491	1.58172
Aco011224	AcGASA3	1.51625	10.3023	0.541581	98.493	0.151516	0.444114	0.40331	0.325875	0.151303	0	3.64216	0.622146	0	0	0.875745	0	5.11362	0.359798	0	0.101213	0.645145	0.74828	0	0	0.345618	0.310072	0.50423
Aco001116	AcGASA4	137.945	222.262	290.729	225.085	292.252	318.665	493.299	138.034	110.674	128.967	74.1048	106.245	109.62	87.6396	328.792	1345.15	485.875	75.2941	79.6622	158.768	114.4	89.9076	108.694	83.3525	140.96	358.752	309.199
Aco001067	AcGASA5	72.3738	33.8927	24.119	23.7061	51.0902	27.0181	20.8592	0.387113	0.37674	0.445762	182.612	0.17077	0.404295	0.098638	27.3548	22.4616	0.514781	28.1851	23.7439	19.6576	20.4605	23.8351	415.756	1578.01	563.78	21.0959	6.04595
Aco000980	AcGASA6	55.6409	49.8092	17.4842	34.2462	26.1083	16.6273	10.0216	26.951	39.5122	44.0644	77.5209	119.636	53.2396	111.147	44.0204	11.0067	0.0317167	15.7757	16.7638	7.35377	15.6923	40.2761	41.9551	20.9037	8.81804	14.1422	1.03965
Aco000979	AcGASA7	25.0482	34.8182	9.81761	25.1885	7.73805	6.89243	7.75263	10.4345	11.9447	12.4776	8.49551	18.5892	2.6997	25.9568	49.4839	40.9824	191.982	15.7424	5.5631	4.53387	2.05024	24.8664	19.2846	8.05747	1.92197	7.14024	0.588004
Aco002373	AcGASA8	25.7893	18.0143	5.75949	14.1058	6.47284	1.39834	1.21104	5.53214	10.2651	8.26416	11.4094	20.1399	30.1537	20.8959	2.53509	0	2.6774	8.88749	18.7561	4.69919	2.41779	40.2717	25.9605	22.5238	30.2427	0	0.115607
Aco004893	AcGASA9	5.04441	4.85866	3.06448	3.59433	2.75455	1.77482	1.88774	5.18954	6.10827	5.72962	5.22567	5.99967	5.15956	5.21342	3.64368	4.87798	0	2.13623	1.15544	0.863352	1.07413	2.07445	2.56727	2.08051	1.75374	0.932389	0.80517
Aco008536	AcGASA10	207.353	142.486	166.879	112.797	101.896	43.747	84.9482	12.652	39.7602	86.7615	61.4893	95.3749	49.4698	205.415	220.316	121.577	4.99825	87.372	72.1161	64.893	124.159	131.972	181.853	163.45	132.773	104.431	18.1813
Aco000098	AcGASA11	0.711581	0.435372	2.21721	0.623786	0.395265	1.41328	4.51727	0.48179	1.1016	1.01838	88.7186	0.407827	1.3061	1.4327	0.743265	0.602406	0.747547	0.682391	0.234341	1.3817	0.487399	1.76425	0.495331	0.200885	0.328825	0.625406	1.08914
Aco003244	AcGASA12	201.89	225.454	145.041	197.546	98.5282	53.6663	53.5445	68.0508	41.3841	22.031	38.8196	58.405	21.5763	44.8794	83.4129	2.74177	0.287647	27.306	17.5748	15.5677	26.1927	105.07	338.957	614.695	564.464	15.8891	2.10327
Aco015815	AcGASA13	1.69842	0.840932	1.95935	1.01883	2.1566	1.77176	3.2674	1.16013	1.94145	2.73825	30.4423	4.50934	10.8681	5.208	0.378364	0.877198	1.33532	0.113981	0.237175	0.20058	0.140752	1.85623	2.1638	2.15533	1.63896	1.12678	2.29079
Aco015632	AcGASA14	0.375331	0.990169	1.48686	0.54516	0.970924	0.375474	1.84922	0.553682	0.927551	0.814763	17.0439	0.673226	1.29761	2.54092	0.46907	0.545477	2.5653	0.743524	1.06359	1.31277	1.04681	0.732652	0.528022	1.07324	0.780827	0.665997	0.372283
Aco010336	AcGASA15	0.16448	0	0	1.46485	0.267686	0.448428	0	0.172679	0.274412	0.620359	0.235652	0.252924	0.247218	2.98913	0	1.45355	127.485	0.544086	0	3.38315	1.1086	0.246709	0.0475853	0	0	2.4809	0.968731
