# Supplementary material for: Genome-Wide Identification and Characterization of Gibberellic Acid-Stimulated Arabidopsis Gene Family in Pineapple (Ananas comosus)
Source: Int J Mol Sci. 2023 Dec 2;24(23):17063. doi: 10.3390/ijms242317063 (PMC10706908; doi:10.3390/ijms242317063)
Supplement: Supplementary file 1 [file ijms-24-17063-s001.zip › Table S8.xlsx]

## Sheet: Sheet1
Table S8: Raw data on average expression of different tissue sites in pineapple
AcGASAs gene id	AcGASAs gene name	Leaf	Petal	Sepal	Bract	Stem	Stamen	Style	Ovalu_wall	Ovalu	Receptacle	Placenta	Core	FlowerDisk	Root
Aco012370	AcGASA1	0.0936401	36.3406	21.288	11.0615	0.643025	4.20783	36.3732	4.14841	5.90069	5.81111	6.88491	0.15246	21.4431	1.84029
Aco011225	AcGASA2	1.02205	0.279402	0.461733	0.923333	6.62077	279.543	0.152033	0.91919	1.74811	0.90822	0.567254	4.09463	0.911971	25.5129
Aco011224	AcGASA3	0	0	0	0.127542	0	15.8395	0	0	0	0.262343	0	0.345575	0	1.08488
Aco001116	AcGASA4	0.111875	146.074	3.48945	1.34937	0.79833	12.7521	100.918	3.93937	9.88631	6.51168	1.88409	1.74768	16.898	2.5487
Aco001067	AcGASA5	0.0920606	19.2458	3.95653	2.17146	0.10707	2.62339	17.4802	0.383682	0.315079	1.4949	0.0852592	0	2.89818	1.31063
Aco000980	AcGASA6	0.143443	7.21507	19.7664	13.8668	326.413	2.0438	2.94449	40.8972	9.47241	67.7662	25.5872	59.1152	43.5793	1.22286
Aco000979	AcGASA7	0	0	0	0	0.0825964	0	0	0.0384421	0	0.0594482	0	0.0476157	0	0
Aco002373	AcGASA8	0	0.987297	1.96209	1.9253	0.231416	2.68483	11.1743	0.0650505	3.48058	0.951186	0.374232	0	1.37955	0
Aco004893	AcGASA9	0.168129	1.75366	0.953802	0.299139	3.7177	0.851584	3.81694	1.48557	1.82696	3.09668	3.71928	1.24775	3.01335	1.28536
Aco008536	AcGASA10	0.154338	296.842	57.1856	24.5742	72.8425	72.1513	180.671	90.8383	18.5898	38.2206	118.528	51.3589	164.556	12.7138
Aco000098	AcGASA11	0	0	0.103234	0	0	0.757616	0	0	0	0	0	0	0	0
Aco003244	AcGASA12	1.00465	3.68841	4.63391	4.43249	0.80287	26.8666	17.4896	0.705754	0.0899066	0.794982	0.570204	0.100949	2.32881	0
Aco015815	AcGASA13	0.297667	1.58939	0.194861	0.0899069	0	0.720356	1.38375	0.448956	2.20934	0	0.496641	0	0.246761	0.476719
Aco015632	AcGASA14	0.290313	0.857987	0.553144	0.448061	5.57738	0.833282	0.933726	5.90865	15.0944	1.7586	11.7476	4.96679	2.37191	2.9619
Aco010336	AcGASA15	0.315927	0.596631	1.22174	1.11825	10.8731	3.38013	1.78557	22.0729	401.782	8.03924	44.6815	12.5903	14.6197	150.333
