# Supplementary material for: Genome-Wide Identification and Characterization of Gibberellic Acid-Stimulated Arabidopsis Gene Family in Pineapple (Ananas comosus)
Source: Int J Mol Sci. 2023 Dec 2;24(23):17063. doi: 10.3390/ijms242317063 (PMC10706908; doi:10.3390/ijms242317063)
Supplement: Supplementary file 1 [file ijms-24-17063-s001.zip › Table S9.xlsx]

## Sheet: Sheet1
Table S9: Information of miRNA targets in pineapple GASA gene family
miRNA_Acc.	Target_Acc.	AcGASAs gene id	Expectation	miRNA_start	miRNA_end	Target_start	Target_end	miRNA_aligned_fragment	Target_aligned_fragment	Inhibition	Multiplicity
miR395a	AcGASA2	Aco011225	4.5	1	21	238	258	CUGAAGUGUUUGGGGGAACUC	GCGUCCCCCCGGGGACUUCGG	Cleavage	1
miR529d	AcGASA5	Aco001067	4	1	21	41	61	AGAAGAGAGAGAGCACAGCCC	CAGCUGGGUUUUCUCGCUUUU	Cleavage	1
miR156h	AcGASA5	Aco001067	4.5	1	20	405	425	UGACAGAAGAAAGAG-AGCAC	GUGCUGCUCUUUUUUUUGUUU	Cleavage	1
miR2677a	AcGASA5	Aco001067	4.5	1	22	516	537	UUUAUUGAUAUUGCUAAUAGAU	UGUGGUUUCCAGUAUCAAUAAG	Cleavage	1
miR529b	AcGASA5	Aco001067	4.5	1	21	41	61	AGAAGAGAGAGAGUACAGCUU	CAGCUGGGUUUUCUCGCUUUU	Cleavage	1
miR529c	AcGASA5	Aco001067	4.5	1	21	41	61	AGAAGAGAGAGAGUACAGCCU	CAGCUGGGUUUUCUCGCUUUU	Cleavage	1
miR529f	AcGASA5	Aco001067	4.5	1	21	41	61	AGAAGAGAGAGAGUACAGCCC	CAGCUGGGUUUUCUCGCUUUU	Cleavage	1
miR1088a	AcGASA5	Aco001067	5	1	21	318	338	CAGAAGAAAGAGAGCACGCAU	AUUUUUUCUCUUUUUUUUUUG	Cleavage	1
miR156d	AcGASA5	Aco001067	5	1	21	404	425	UGACAGAAGAGAGAG-AGCACA	GGUGCUGCUCUUUUUUUUGUUU	Cleavage	1
miR156k	AcGASA5	Aco001067	5	1	20	405	425	UGACAGAAGAGAGAG-AGCAC	GUGCUGCUCUUUUUUUUGUUU	Cleavage	1
miR159k	AcGASA5	Aco001067	5	1	21	404	425	UGACAGAAGAGAGAG-AGCACA	GGUGCUGCUCUUUUUUUUGUUU	Cleavage	1
miR529e	AcGASA5	Aco001067	5	1	21	41	61	AGAAGAGAGAGGGUACAGCCC	CAGCUGGGUUUUCUCGCUUUU	Cleavage	1
miR530a	AcGASA6	Aco000980	3.5	1	21	83	103	UGCAUUUGCACCUGCACCUGC	GCUGCUCCAGGUGCAAAUGCG	Cleavage	1
miR530b	AcGASA6	Aco000980	3.5	1	20	84	103	UGCAUUUGCACCUGCAUCUU	CUGCUCCAGGUGCAAAUGCG	Cleavage	1
miR530c	AcGASA6	Aco000980	3.5	1	20	84	103	UGCAUUUGCACCUGCACCUA	CUGCUCCAGGUGCAAAUGCG	Cleavage	1
miR156p	AcGASA7	Aco000979	4	1	20	81	100	UGACAGAAGAGAGCGAGCAC	CUACUCGAUCUCUUCUGUUU	Cleavage	1
miR156a	AcGASA7	Aco000979	4.5	1	21	80	100	UGACAGAAGAGAGUGAGCACA	UCUACUCGAUCUCUUCUGUUU	Cleavage	1
miR156f	AcGASA7	Aco000979	4.5	1	20	80	99	GACAGAAGAGAGUGAGCACA	UCUACUCGAUCUCUUCUGUU	Cleavage	1
miR156i	AcGASA7	Aco000979	4.5	1	20	81	100	UGACAGAAGAGAGUGAGCAC	CUACUCGAUCUCUUCUGUUU	Cleavage	1
miR156l	AcGASA7	Aco000979	4.5	1	20	80	99	GACAGAAGAGAGUGAGCAUA	UCUACUCGAUCUCUUCUGUU	Cleavage	1
miR156n	AcGASA7	Aco000979	4.5	1	20	81	100	CGACAGAAGAGAGUGAGCAC	CUACUCGAUCUCUUCUGUUU	Cleavage	1
miR156d	AcGASA7	Aco000979	5	1	21	80	100	UGACAGAAGAGAGAGAGCACA	UCUACUCGAUCUCUUCUGUUU	Cleavage	1
miR156k	AcGASA7	Aco000979	5	1	20	81	100	UGACAGAAGAGAGAGAGCAC	CUACUCGAUCUCUUCUGUUU	Cleavage	1
miR156o	AcGASA7	Aco000979	5	1	20	81	100	UGACAGAAGAGAGGGAGCAC	CUACUCGAUCUCUUCUGUUU	Cleavage	1
miR159k	AcGASA7	Aco000979	5	1	21	80	100	UGACAGAAGAGAGAGAGCACA	UCUACUCGAUCUCUUCUGUUU	Cleavage	1
miR168a	AcGASA12	Aco003244	5	1	21	232	252	UCGCUUGGUGCAGGUCGGGAA	GGCACGUGCUGCAUCAAGUGC	Cleavage	1
miR395a	AcGASA14	Aco015632	5	1	21	342	362	CUGAAGUGUUUGGGGGAACUC	GCGUCCCGCCCGGCACUUCGG	Translation	1
miR396e	AcGASA15	Aco010336	2.5	1	21	87	107	UCCACAGGCUUUCUUGAACUG	CUGUGCAAGAGGGCCUGUGGG	Cleavage	1
miR396i	AcGASA15	Aco010336	2.5	1	21	87	107	UCCACAGGCUUUCUUGAACGG	CUGUGCAAGAGGGCCUGUGGG	Cleavage	1
miR396h	AcGASA15	Aco010336	3.5	1	22	87	108	CUCCACAGGCUUUCUUGAACUG	CUGUGCAAGAGGGCCUGUGGGA	Cleavage	1
miR2677a	AcGASA15	Aco010336	4	1	22	589	611	UUUAUUGAUAUUGC-UAAUAGAU	GCUUGUUAUGUAAUAUCAAUAAU	Cleavage	1
miR396d	AcGASA15	Aco010336	4	1	21	87	107	UCCUCAGGCUUUCUUGAACUG	CUGUGCAAGAGGGCCUGUGGG	Cleavage	1
