# Supplementary material for: Genome-Wide Identification and Characterization of Gibberellic Acid-Stimulated Arabidopsis Gene Family in Pineapple (Ananas comosus)
Source: Int J Mol Sci. 2023 Dec 2;24(23):17063. doi: 10.3390/ijms242317063 (PMC10706908; doi:10.3390/ijms242317063)
Supplement: Supplementary file 1 [file ijms-24-17063-s001.zip › Table S10.xlsx]

## Sheet: Sheet2
Table S10: Cis-element analysis of AcGASA gene promoters
Gene name	Gene ID	Site Name	Organism	postion(bp)	Strand	Sequence	Function
AcGASA1	Aco012370	CE3	Oryza sativa	1185	+	AACGCttata	ABA responsive element
AcGASA1	Aco012370	G-Box	Petroselinum crispum	1231	+	ACCACtagtc	light responsive element
AcGASA1	Aco012370	G-Box	Petroselinum crispum	1749	-	acaaaGTGGT	light responsive element
AcGASA1	Aco012370	LS7	Arabidopsis thaliana; Nicotiana tabacum	284	-	tttttTACGT	salicylic acid-inducible element
AcGASA1	Aco012370	LS7	Arabidopsis thaliana; Nicotiana tabacum	285	-	tttttTACGT	salicylic acid-inducible element
AcGASA1	Aco012370	LS7	Arabidopsis thaliana; Nicotiana tabacum	286	-	tttttTACGT	salicylic acid-inducible element
AcGASA1	Aco012370	LS7	Arabidopsis thaliana; Nicotiana tabacum	287	-	tttttTACGT	salicylic acid-inducible element
AcGASA1	Aco012370	LS7	Arabidopsis thaliana; Nicotiana tabacum	288	-	tttttTACGT	salicylic acid-inducible element
AcGASA1	Aco012370	LS7	Arabidopsis thaliana; Nicotiana tabacum	289	-	tttttTACGT	salicylic acid-inducible element
AcGASA1	Aco012370	LS7	Arabidopsis thaliana; Nicotiana tabacum	290	-	tttttTACGT	salicylic acid-inducible element
AcGASA1	Aco012370	MotifI and motif III (S000291)	Oryza sativa	97	-	tctagGTACT	ABA responsive element
AcGASA1	Aco012370	MotifI and motif III (S000291)	Oryza sativa	186	-	gcttcGTACT	ABA responsive element
AcGASA1	Aco012370	MotifI and motif III (S000291)	Oryza sativa	1220	-	tctatGTACT	ABA responsive element
AcGASA1	Aco012370	CE3	Hordeum vulgare	359	+	CCTACggggc	ABA responsive element
AcGASA1	Aco012370	G-box	Nicotiana tabacum	1399	+	GCCACttgcg	light responsive element
AcGASA1	Aco012370	ABRE A	Zea mays	1399	+	GCCACttgcg	ABA responsive element
AcGASA1	Aco012370	ABRE	Brassica napus	1399	+	GCCACttgcg	ABA responsive element
AcGASA1	Aco012370	G-box	Pisum sativum	622	-	atttacATGTG	light responsive element
AcGASA1	Aco012370	G-box	Oryza sativa	360	+	CTACGgggcca	light responsive element
AcGASA1	Aco012370	D3	Glycine max	61	-	ctaggcAAATA	auxin responsive element
AcGASA1	Aco012370	D3	Glycine max	1312	+	TATTTcattta	auxin responsive element
AcGASA1	Aco012370	D3	Glycine max	1524	-	taaaaaAAATA	auxin responsive element
AcGASA1	Aco012370	D3	Glycine max	1691	+	TATTTggttgg	auxin responsive element
AcGASA1	Aco012370	D3	Glycine max	1903	+	TATTTttttta	auxin responsive element
AcGASA1	Aco012370	D2	Glycine max	752	-	aattaaaTAAAT	auxin responsive element
AcGASA1	Aco012370	G-box	Arabidopsis thaliana	624	-	ttacatgTGTC	light responsive element
AcGASA1	Aco012370	C2	Glycine max	1432	+	AATAAtataaaaaataaatt	auxin responsive element
AcGASA1	Aco012370	CORE	Oryza sativa	80	-	ataataaaattTTTATttctaggtactc	defense and stress responsive element
AcGASA1	Aco012370	CORE	Oryza sativa	488	+	atatatatatatATAAAagttctctaaa	defense and stress responsive element
AcGASA1	Aco012370	CORE	Oryza sativa	771	+	tagaatagtaaaATAAAaaatatataag	defense and stress responsive element
AcGASA1	Aco012370	CORE	Oryza sativa	1426	+	attaacaataatATAAAaaataaattta	defense and stress responsive element
AcGASA1	Aco012370	CORE	Oryza sativa	1809	-	tatatatatatTTTATatatatttttta	defense and stress responsive element
AcGASA1	Aco012370	NDE	Glycine max	219	+	CATATa	auxin responsive element
AcGASA1	Aco012370	NDE	Glycine max	824	+	CATATg	auxin responsive element
AcGASA1	Aco012370	NDE	Glycine max	824	-	cATATG	auxin responsive element
AcGASA1	Aco012370	NDE	Glycine max	831	+	CATATa	auxin responsive element
AcGASA1	Aco012370	NDE	Glycine max	1341	-	aATATG	auxin responsive element
AcGASA1	Aco012370	NDE	Glycine max	1497	+	CATATa	auxin responsive element
AcGASA1	Aco012370	NDE	Glycine max	1603	+	CATATa	auxin responsive element
AcGASA1	Aco012370	NDE	Glycine max	1663	-	gATATG	auxin responsive element
AcGASA1	Aco012370	LTRE-1	Hordeum vulgare	405	+	CCGAAa	low-temperature responsive element
AcGASA1	Aco012370	GARE	Oryza sativa; Hordeum vulgare	1457	+	CCTTTt	Gibberellin responsive element
AcGASA1	Aco012370	GARE	Oryza sativa; Hordeum vulgare	1552	-	aAAAGG	Gibberellin responsive element
AcGASA1	Aco012370	GARE	Oryza sativa; Hordeum vulgare	1888	+	CCTTTt	Gibberellin responsive element
AcGASA1	Aco012370	DRE	Hordeum vulgare	138	+	aTCGAC	dehydration responsive element
AcGASA1	Aco012370	GCN4	Oryza sativa	275	-	gcTTGTT	endosperm-specific expression
AcGASA1	Aco012370	GCN5	Oryza sativa	1171	+	AACAAcc	endosperm-specific expression
AcGASA1	Aco012370	GCN6	Oryza sativa	1536	+	AACAAtc	endosperm-specific expression
AcGASA1	Aco012370	GCN7	Oryza sativa	1633	+	AACAAaa	endosperm-specific expression
AcGASA1	Aco012370	GCN8	Oryza sativa	1836	+	AACAAaa	endosperm-specific expression
AcGASA1	Aco012370	GARE	Arabidopsis thaliana	276	-	ctTGTTA	Gibberellin responsive element
AcGASA1	Aco012370	GARE	Arabidopsis thaliana	601	+	TAACAat	Gibberellin responsive element
AcGASA1	Aco012370	GARE	Arabidopsis thaliana	1260	+	TAACAat	Gibberellin responsive element
AcGASA1	Aco012370	GARE	Arabidopsis thaliana	1291	+	TAACAtg	Gibberellin responsive element
AcGASA1	Aco012370	GARE	Arabidopsis thaliana	1428	+	TAACAat	Gibberellin responsive element
AcGASA1	Aco012370	GARE	Arabidopsis thaliana	1632	+	TAACAaa	Gibberellin responsive element
AcGASA1	Aco012370	GARE	Arabidopsis thaliana	1835	+	TAACAaa	Gibberellin responsive element
AcGASA1	Aco012370	TGACG-motif	Hordeum vulgare	1725	-	TGACG	MeJA responsive element
AcGASA1	Aco012370	CGTCA-motif	Hordeum vulgare	1725	+	CGTCA	MeJA responsive element
AcGASA2	Aco011225	LRE	Petroselinum crispum	244	+	AACCTaataa	light responsive element
AcGASA2	Aco011225	LRE	Petroselinum crispum	530	+	AACCTtcctt	light responsive element
AcGASA2	Aco011225	D1	Glycine max	1261	+	ACAGTattta	auxin responsive element
AcGASA2	Aco011225	D1	Glycine max	1917	+	ACAGTatcca	auxin responsive element
AcGASA2	Aco011225	LS7	Arabidopsis thaliana; Nicotiana tabacum	252	+	AAGTCagaaa	salicylic acid-inducible element
AcGASA2	Aco011225	LS7	Arabidopsis thaliana; Nicotiana tabacum	378	+	AAGTCctaaa	salicylic acid-inducible element
AcGASA2	Aco011225	LS7	Arabidopsis thaliana; Nicotiana tabacum	862	+	ACGTAattgc	salicylic acid-inducible element
AcGASA2	Aco011225	LS7	Arabidopsis thaliana; Nicotiana tabacum	1250	+	AAGTCataag	salicylic acid-inducible element
AcGASA2	Aco011225	LS7	Arabidopsis thaliana; Nicotiana tabacum	1433	-	tataaGAGGT	salicylic acid-inducible element
AcGASA2	Aco011225	LS7	Arabidopsis thaliana; Nicotiana tabacum	1745	-	cctaaGATGT	salicylic acid-inducible element
AcGASA2	Aco011225	MotifI and motif III (S000291)	Oryza sativa	60	-	gtaatGTACT	ABA responsive element
AcGASA2	Aco011225	MotifI and motif III (S000291)	Oryza sativa	1953	-	gacacGTACT	ABA responsive element
AcGASA2	Aco011225	TCA-1	Hordeum vulgare; Nicotiana tabacum	1983	+	TCATCttttc	salicylic acid-inducible element
AcGASA2	Aco011225	ABRE B	Zea mays	1680	-	aactcGTGGA	ABA responsive element
AcGASA2	Aco011225	ABRE B	Zea mays	1923	+	TCCACatgcc	ABA responsive element
AcGASA2	Aco011225	ABRE B	Zea mays	1962	+	TCCACagcac	ABA responsive element
AcGASA2	Aco011225	ACGT motif	Phaseolus vulgaris	1069	+	ACACAtgttat	seed expression responsive element
AcGASA2	Aco011225	SRE	Nicotiana tabacum	103	-	tcctcagaTACCA	MeJA responsive element
AcGASA2	Aco011225	SRE	Nicotiana tabacum	919	+	TGGTAagtaagaa	MeJA responsive element
AcGASA2	Aco011225	C2	Glycine max	560	+	AATAAtaataacaacagcag	auxin responsive element
AcGASA2	Aco011225	W-box	Arabidopsis thaliana	395	-	GTCAA	salicylic acid-inducible element
AcGASA2	Aco011225	W-box	Arabidopsis thaliana	639	+	TTGAC	salicylic acid-inducible element
AcGASA2	Aco011225	W-box	Arabidopsis thaliana	694	+	TTGAC	salicylic acid-inducible element
AcGASA2	Aco011225	T/G-box	Lycopersicon esculentum; Arabidopsis thaliana	821	-	cACGTT	MeJA responsive element
AcGASA2	Aco011225	T/G-box	Lycopersicon esculentum; Arabidopsis thaliana	1832	+	AACGTg	MeJA responsive element
AcGASA2	Aco011225	GARE	Oryza sativa; Hordeum vulgare	390	-	aAAAGG	Gibberellin responsive element
AcGASA2	Aco011225	GARE	Oryza sativa; Hordeum vulgare	536	+	CCTTTt	Gibberellin responsive element
AcGASA2	Aco011225	I box	Lycopersicon esculentum; Arabidopsis thaliana	612	-	cTTATC	light responsive element
AcGASA2	Aco011225	AACA motifs	Oryza sativa	1375	-	gtTTGTT	endosperm-specific expression
AcGASA2	Aco011225	G box	Arabidopsis thaliana; Lycopersicon esculentum	319	-	atCTAAC	defense and stress responsive element
AcGASA2	Aco011225	G box	Arabidopsis thaliana; Lycopersicon esculentum	408	-	taCTAAC	defense and stress responsive element
AcGASA2	Aco011225	G box	Arabidopsis thaliana; Lycopersicon esculentum	526	-	caCTAAC	defense and stress responsive element
AcGASA2	Aco011225	G box	Arabidopsis thaliana; Lycopersicon esculentum	786	-	taCTAAC	defense and stress responsive element
AcGASA2	Aco011225	GARE	Oryza sativa	40	-	gcTGTTA	Gibberellin responsive element
AcGASA2	Aco011225	GARE	Oryza sativa	1104	-	taTGTTA	Gibberellin responsive element
AcGASA2	Aco011225	MBS	Arabidopsis thaliana	1670	+	CAACTG	drought-inducibility responsive element
AcGASA2	Aco011225	MBS	Arabidopsis thaliana	1854	+	CAACTG	drought-inducibility responsive element
AcGASA2	Aco011225	ARE	Zea mays	930	+	AAACCA	anaerobic induction responsive element
AcGASA2	Aco011225	ARE	Zea mays	1879	+	AAACCA	anaerobic induction responsive element
AcGASA3	Aco011224	LRE	Petroselinum crispum	127	-	aggccAGGTT	light responsive element
AcGASA3	Aco011224	LRE	Petroselinum crispum	575	+	AACCTaagat	light responsive element
AcGASA3	Aco011224	D1	Glycine max	1440	-	cagcaACTGT	auxin responsive element
AcGASA3	Aco011224	D1	Glycine max	1935	+	ACAGTtgaaa	auxin responsive element
AcGASA3	Aco011224	LS7	Arabidopsis thaliana; Nicotiana tabacum	342	+	ATGTCaaaaa	salicylic acid-inducible element
AcGASA3	Aco011224	MotifI and motif III (S000291)	Oryza sativa	28	-	gacacGTACT	ABA responsive element
AcGASA3	Aco011224	ABRE A	Zea mays	1168	-	acctgGTGGC	ABA responsive element
AcGASA3	Aco011224	TCA-1	Hordeum vulgare; Nicotiana tabacum	58	+	TCATCttttc	salicylic acid-inducible element
AcGASA3	Aco011224	ABRE B	Zea mays	37	+	TCCACagcac	ABA responsive element
AcGASA3	Aco011224	D3	Glycine max	892	+	TATTTcattaa	auxin responsive element
AcGASA3	Aco011224	NDE	Glycine max	239	-	tATATG	auxin responsive element
AcGASA3	Aco011224	NDE	Glycine max	339	-	tATATG	auxin responsive element
AcGASA3	Aco011224	NDE	Glycine max	539	+	CATATt	auxin responsive element
AcGASA3	Aco011224	NDE	Glycine max	666	-	aATATG	auxin responsive element
AcGASA3	Aco011224	NDE	Glycine max	951	+	CATATt	auxin responsive element
AcGASA3	Aco011224	NDE	Glycine max	1195	-	tATATG	auxin responsive element
AcGASA3	Aco011224	LTRE-1	Hordeum vulgare	333	-	tTTCGG	low-temperature responsive element
AcGASA3	Aco011224	GARE	Oryza sativa; Hordeum vulgare	216	+	CCTTTt	Gibberellin responsive element
AcGASA3	Aco011224	GARE	Oryza sativa; Hordeum vulgare	1023	-	aAAAGG	Gibberellin responsive element
AcGASA3	Aco011224	GARE	Oryza sativa; Hordeum vulgare	1686	-	aAAAGG	Gibberellin responsive element
AcGASA3	Aco011224	GCC-box	Arabidopsis thaliana; Lycopersicon esculentum	1214	-	tGCGGC	MeJA responsive element
AcGASA3	Aco011224	GCC-box	Arabidopsis thaliana; Lycopersicon esculentum	1368	-	gGCGGC	MeJA responsive element
AcGASA3	Aco011224	GCC-box	Arabidopsis thaliana; Lycopersicon esculentum	1372	+	GCCGCc	MeJA responsive element
AcGASA3	Aco011224	(CA)n	Brassica napus	295	-	GTGTTtg	endosperm-specific expression
AcGASA3	Aco011224	(CA)n	Brassica napus	1474	-	GTGTTtg	endosperm-specific expression
AcGASA3	Aco011224	(CA)n	Brassica napus	1552	+	caAACAC	endosperm-specific expression
AcGASA3	Aco011224	(CA)n	Brassica napus	1641	-	GTGTTag	endosperm-specific expression
AcGASA3	Aco011224	GARE	Oryza sativa	470	+	TAACAaa	Gibberellin responsive element
AcGASA3	Aco011224	GARE	Oryza sativa	536	+	TAACAta	Gibberellin responsive element
AcGASA3	Aco011224	GARE	Oryza sativa	1543	-	tgTGTTA	Gibberellin responsive element
AcGASA3	Aco011224	GARE	Oryza sativa	1640	-	tgTGTTA	Gibberellin responsive element
AcGASA3	Aco011224	ARE	Zea mays	179	-	AAACCA	anaerobic induction responsive element
AcGASA3	Aco011224	ARE	Zea mays	804	+	AAACCA	anaerobic induction responsive element
AcGASA3	Aco011224	ARE	Zea mays	1087	+	AAACCA	anaerobic induction responsive element
AcGASA3	Aco011224	MBS	Arabidopsis thaliana	1443	+	CAACTG	drought-inducibility responsive element
AcGASA3	Aco011224	MBS	Arabidopsis thaliana	1936	-	CAACTG	drought-inducibility responsive element
AcGASA3	Aco011224	TC-rich repeats	Nicotiana tabacum	483	-	GTTTTCTTAC	defense and stress responsive element
AcGASA4	Aco001116	D1	Glycine max	221	-	gattaACTGT	auxin responsive element
AcGASA4	Aco001116	D1	Glycine max	1049	+	ACAGTgagaa	auxin responsive element
AcGASA4	Aco001116	LS7	Arabidopsis thaliana; Nicotiana tabacum	300	-	tgtacTACGT	salicylic acid-inducible element
AcGASA4	Aco001116	ABRE A	Zea mays	213	+	GCCACgcaga	ABA responsive element
AcGASA4	Aco001116	ABRE A	Zea mays	466	+	GCCACttgtt	ABA responsive element
AcGASA4	Aco001116	ACGT motif	Nicotiana tabacum	302	-	tactaCGTAC	seed expression responsive element
AcGASA4	Aco001116	ABRE B	Zea mays	111	-	cagttGTGGA	ABA responsive element
AcGASA4	Aco001116	LRE	Petroselinum crispum	1822	+	TCCACtttga	light responsive element
AcGASA4	Aco001116	D2	Glycine max	695	+	ATTTAtttaaaa	auxin responsive element
AcGASA4	Aco001116	D2	Glycine max	1348	+	ATTTAtatcaaa	auxin responsive element
AcGASA4	Aco001116	LRE	Pisum sativum	1325	+	ACTATtctatctatt	light responsive element
AcGASA4	Aco001116	LRE	Pisum sativum	1562	+	ACTATgtccacaata	light responsive element
AcGASA4	Aco001116	GARE	Oryza sativa; Hordeum vulgare	80	-	aAAAGG	Gibberellin responsive element
AcGASA4	Aco001116	GARE	Oryza sativa; Hordeum vulgare	984	+	CCTTTt	Gibberellin responsive element
AcGASA4	Aco001116	GARE	Oryza sativa; Hordeum vulgare	1778	+	CCTTTt	Gibberellin responsive element
AcGASA4	Aco001116	AACA motifs	Oryza sativa	51	+	AACAAag	endosperm-specific expression
AcGASA4	Aco001116	AACA motifs	Oryza sativa	1138	-	ttTTGTT	endosperm-specific expression
AcGASA4	Aco001116	AACA motifs	Oryza sativa	1167	+	AACAAaa	endosperm-specific expression
AcGASA4	Aco001116	GARE	Arabidopsis thaliana	344	-	atTGTTA	Gibberellin responsive element
AcGASA4	Aco001116	GARE	Arabidopsis thaliana	514	-	ctTGTTA	Gibberellin responsive element
AcGASA4	Aco001116	GARE	Arabidopsis thaliana	1553	+	TAACAta	Gibberellin responsive element
AcGASA4	Aco001116	GARE	Oryza sativa	1553	+	TAACAta	Gibberellin responsive element
AcGASA4	Aco001116	ERE	Lycopersicon esculentum; Dianthus caryophyllus; Lycopersicon chilense	155	-	tTTGAAtt	ethylene responsive element
AcGASA4	Aco001116	ERE	Lycopersicon esculentum; Dianthus caryophyllus; Lycopersicon chilense	167	-	tTTGAAat	ethylene responsive element
AcGASA4	Aco001116	ERE	Lycopersicon esculentum; Dianthus caryophyllus; Lycopersicon chilense	236	+	agTTCAAa	ethylene responsive element
AcGASA4	Aco001116	ERE	Lycopersicon esculentum; Dianthus caryophyllus; Lycopersicon chilense	1266	-	tTTGAAaa	ethylene responsive element
AcGASA4	Aco001116	ERE	Lycopersicon esculentum; Dianthus caryophyllus; Lycopersicon chilense	1810	-	tTTGAAtt	ethylene responsive element
AcGASA4	Aco001116	SURE2	Solanum tuberosum	1104	-	attaGTATT	sucrose responsive element
AcGASA4	Aco001116	MBS	Arabidopsis thaliana	111	-	CAACTG	drought-inducibility responsive element
AcGASA4	Aco001116	CGTCA-motif	Hordeum vulgare	545	+	CGTCA	MeJA responsive element
AcGASA4	Aco001116	TC-rich repeats	Nicotiana tabacum	895	+	GTTTTCTTAC	defense and stress responsive element
AcGASA4	Aco001116	TGACG-motif	Hordeum vulgare	545	-	TGACG	MeJA responsive element
AcGASA5	Aco001067	LRE	Petroselinum crispum	243	+	AACCTctctt	light responsive element
AcGASA5	Aco001067	LRE	Petroselinum crispum	1292	+	AACCTaacat	light responsive element
AcGASA5	Aco001067	D1	Glycine max	903	-	tttaaACTGT	auxin responsive element
AcGASA5	Aco001067	D1	Glycine max	1513	+	ACAGTggcca	auxin responsive element
AcGASA5	Aco001067	LS7	Arabidopsis thaliana; Nicotiana tabacum	1771	+	ACGTAatatt	salicylic acid-inducible element
AcGASA5	Aco001067	AGCAACGGTC motifs	Zea mays	318	+	AGCAAgtggc	anaerobic induction responsive element
AcGASA5	Aco001067	AGCAACGGTC motifs	Zea mays	553	-	tgctgTTGCT	anaerobic induction responsive element
AcGASA5	Aco001067	AGCAACGGTC motifs	Zea mays	1835	+	AGCAAaactc	anaerobic induction responsive element
AcGASA5	Aco001067	MotifI and motif III (S000291)	Oryza sativa	869	+	AGTACatatc	ABA responsive element
AcGASA5	Aco001067	MotifI and motif III (S000291)	Oryza sativa	1862	-	gcagtGTACT	ABA responsive element
AcGASA5	Aco001067	ABRE A	Zea mays	318	-	agcaaGTGGC	ABA responsive element
AcGASA5	Aco001067	ABRE A	Zea mays	1701	+	GCCACagtgg	ABA responsive element
AcGASA5	Aco001067	ABRE A	Zea mays	1702	-	ccacaGTGGC	ABA responsive element
AcGASA5	Aco001067	SRE	Nicotiana tabacum	342	+	TGGTAtccgagac	defense and stress responsive element
AcGASA5	Aco001067	SRE	Nicotiana tabacum	663	+	TGGTAgattaatt	defense and stress responsive element
AcGASA5	Aco001067	W-box	Arabidopsis thaliana	646	+	TGGAC	salicylic acid-inducible element
AcGASA5	Aco001067	W-box	Arabidopsis thaliana	1181	+	TTGGC	salicylic acid-inducible element
AcGASA5	Aco001067	W-box	Arabidopsis thaliana	1372	+	GTGAC	salicylic acid-inducible element
AcGASA5	Aco001067	ACGT motifs	Oryza sativa	855	+	GTAGGtg	endosperm-specific expression
AcGASA5	Aco001067	ACGT motifs	Oryza sativa	1189	+	GTACGag	endosperm-specific expression
AcGASA5	Aco001067	ACGT motifs	Oryza sativa	1209	-	caCGTCC	endosperm-specific expression
AcGASA5	Aco001067	ERE	Lycopersicon esculentum; Dianthus caryophyllus; Lycopersicon chilense	61	+	aaTTCAAa	ethylene responsive element
AcGASA5	Aco001067	ERE	Lycopersicon esculentum; Dianthus caryophyllus; Lycopersicon chilense	579	-	aTTGAAtt	ethylene responsive element
AcGASA5	Aco001067	P-box	Oryza sativa	764	+	CCTTTTG	Gibberellin responsive element
AcGASA5	Aco001067	LTR	Hordeum vulgare	1119	+	CCGAAA	low-temperature responsive element
AcGASA6	Aco000980	LRE	Petroselinum crispum	34	-	atactAGGTT	light responsive element
AcGASA6	Aco000980	LS7	Arabidopsis thaliana; Nicotiana tabacum	149	+	ACCTCacagt	salicylic acid-inducible element
AcGASA6	Aco000980	LS7	Arabidopsis thaliana; Nicotiana tabacum	182	-	tcactGAGGT	salicylic acid-inducible element
AcGASA6	Aco000980	MotifI and motif III (S000291)	Oryza sativa	703	-	gcttgGTACT	ABA responsive element
AcGASA6	Aco000980	B2	Glycine max	688	+	CTTGTtgtgc	auxin responsive element
AcGASA6	Aco000980	B2	Glycine max	1061	+	CTTGTtaaca	auxin responsive element
AcGASA6	Aco000980	D3	Glycine max	1123	-	ctaaccAAATA	auxin responsive element
AcGASA6	Aco000980	D3	Glycine max	1204	+	TATTTattgaa	auxin responsive element
AcGASA6	Aco000980	D3	Glycine max	1253	+	TATTTtttcaa	auxin responsive element
AcGASA6	Aco000980	D3	Glycine max	1470	+	TATTTtattaa	auxin responsive element
AcGASA6	Aco000980	D3	Glycine max	1515	-	tttatcAAATA	auxin responsive element
AcGASA6	Aco000980	D3	Glycine max	1524	+	TATTTacttta	auxin responsive element
AcGASA6	Aco000980	D3	Glycine max	1927	+	TATTTatttta	auxin responsive element
AcGASA6	Aco000980	D3	Glycine max	1973	-	taaaaaAAATA	auxin responsive element
AcGASA6	Aco000980	SURE	Arabidopsis thaliana	209	+	GAGAC	sulfur responsive element
AcGASA6	Aco000980	SURE	Arabidopsis thaliana	460	+	GAGAC	sulfur responsive element
AcGASA6	Aco000980	LTRE-1	Hordeum vulgare	1810	+	CCGAAa	low-temperature responsive element
AcGASA6	Aco000980	SRE	Arabidopsis thaliana	393	-	gGATAA	sugar responsive element
AcGASA6	Aco000980	AACA motifs	Oryza sativa	67	+	AACAAaa	endosperm-specific expression
AcGASA6	Aco000980	AACA motifs	Oryza sativa	616	+	AACAAac	endosperm-specific expression
AcGASA6	Aco000980	AACA motifs	Oryza sativa	1158	+	AACAAat	endosperm-specific expression
AcGASA6	Aco000980	GARE	Arabidopsis thaliana	1061	-	ctTGTTA	Gibberellin responsive element
AcGASA6	Aco000980	GARE	Arabidopsis thaliana	1309	-	taTGTTA	Gibberellin responsive element
AcGASA6	Aco000980	GARE	Oryza sativa	782	-	taCATTA	Gibberellin responsive element
AcGASA6	Aco000980	GARE	Oryza sativa	1309	-	taTGTTA	Gibberellin responsive element
AcGASA6	Aco000980	GARE	Oryza sativa	1462	-	ttCGTTA	Gibberellin responsive element
AcGASA6	Aco000980	ARE	Zea mays	222	-	AAACCA	anaerobic induction responsive element
AcGASA6	Aco000980	ARE	Zea mays	1371	-	AAACCA	anaerobic induction responsive element
AcGASA6	Aco000980	ARE	Zea mays	1672	+	AAACCA	anaerobic induction responsive element
AcGASA6	Aco000980	TC-rich repeats	Nicotiana tabacum	356	+	ATTCTCTAAC	defense and stress responsive element
AcGASA7	Aco000979	LRE	Petroselinum crispum	1889	+	AACCTggcct	light responsive element
AcGASA7	Aco000979	LS7	Arabidopsis thaliana; Nicotiana tabacum	234	-	cctctCACGT	salicylic acid-inducible element
AcGASA7	Aco000979	LS7	Arabidopsis thaliana; Nicotiana tabacum	240	+	ACGTCctcca	salicylic acid-inducible element
AcGASA7	Aco000979	LS7	Arabidopsis thaliana; Nicotiana tabacum	363	+	ACGTCatcaa	salicylic acid-inducible element
AcGASA7	Aco000979	LS7	Arabidopsis thaliana; Nicotiana tabacum	487	+	ACGTCactaa	salicylic acid-inducible element
AcGASA7	Aco000979	LS7	Arabidopsis thaliana; Nicotiana tabacum	1018	-	taaatGGCGT	salicylic acid-inducible element
AcGASA7	Aco000979	LS7	Arabidopsis thaliana; Nicotiana tabacum	1672	+	ACATCctagc	salicylic acid-inducible element
AcGASA7	Aco000979	ABRE A	Zea mays	282	+	GCCACttgac	ABA responsive element
AcGASA7	Aco000979	ABRE A	Zea mays	484	+	GCCACgtcac	ABA responsive element
AcGASA7	Aco000979	D2	Glycine max	94	+	ATTTAtatataa	auxin responsive element
AcGASA7	Aco000979	TGACG-motif	Hordeum vulgare	364	-	TGACG	MeJA responsive element
AcGASA7	Aco000979	TGACG-motif	Hordeum vulgare	488	-	TGACG	MeJA responsive element
AcGASA7	Aco000979	TCT-motif	Arabidopsis thaliana	724	-	TCTTAC	light responsive element
AcGASA7	Aco000979	TCT-motif	Arabidopsis thaliana	843	-	TCTTAC	light responsive element
AcGASA7	Aco000979	TCT-motif	Arabidopsis thaliana	1854	-	TCTTAC	light responsive element
AcGASA7	Aco000979	ARE	Zea mays	473	-	AAACCA	anaerobic induction responsive element
AcGASA7	Aco000979	ARE	Zea mays	1529	+	AAACCA	anaerobic induction responsive element
AcGASA8	Aco002373	LRE	Petroselinum crispum	239	-	aactaAGGTT	light responsive element
AcGASA8	Aco002373	LRE	Petroselinum crispum	908	-	aggagAGGTT	light responsive element
AcGASA8	Aco002373	LRE	Petroselinum crispum	1090	-	gggtcAGGTT	light responsive element
AcGASA8	Aco002373	LRE	Petroselinum crispum	1743	+	AACCTaacaa	light responsive element
AcGASA8	Aco002373	LRE	Petroselinum crispum	1974	+	AACCTtgctt	light responsive element
AcGASA8	Aco002373	LS7	Arabidopsis thaliana; Nicotiana tabacum	297	+	ACGTAataca	salicylic acid-inducible element
AcGASA8	Aco002373	LS7	Arabidopsis thaliana; Nicotiana tabacum	767	-	cctgtAACGT	salicylic acid-inducible element
AcGASA8	Aco002373	LS7	Arabidopsis thaliana; Nicotiana tabacum	1230	+	ATGTCataaa	salicylic acid-inducible element
AcGASA8	Aco002373	LS7	Arabidopsis thaliana; Nicotiana tabacum	1263	+	ACGTGgtgga	salicylic acid-inducible element
AcGASA8	Aco002373	LS7	Arabidopsis thaliana; Nicotiana tabacum	1448	-	gatatGACAT	salicylic acid-inducible element
AcGASA8	Aco002373	LS7	Arabidopsis thaliana; Nicotiana tabacum	1589	+	ACGTGacaaa	salicylic acid-inducible element
AcGASA8	Aco002373	LS7	Arabidopsis thaliana; Nicotiana tabacum	1637	+	ATGTCttata	salicylic acid-inducible element
AcGASA8	Aco002373	B2	Glycine max	819	-	tggacACAAG	auxin responsive element
AcGASA8	Aco002373	B2	Glycine max	1519	+	CTTGTaggca	auxin responsive element
AcGASA8	Aco002373	ABRE A	Zea mays	537	+	GCCACacgga	ABA responsive element
AcGASA8	Aco002373	ABRE A	Zea mays	753	+	GCCACgcggc	ABA responsive element
AcGASA8	Aco002373	ABRE A	Zea mays	813	+	GCCACgtgga	ABA responsive element
AcGASA8	Aco002373	LRE	Petroselinum crispum	813	-	gccacGTGGA	light responsive element
AcGASA8	Aco002373	LTRE-1	Hordeum vulgare	569	+	CCGAAa	low-temperature responsive element
AcGASA8	Aco002373	LTRE-1	Hordeum vulgare	1309	-	tTTCGG	low-temperature responsive element
AcGASA8	Aco002373	GARE	Oryza sativa	342	+	TAACAga	Gibberellin responsive element
AcGASA8	Aco002373	GARE	Oryza sativa	1747	+	TAACAaa	Gibberellin responsive element
AcGASA8	Aco002373	GARE	Oryza sativa	771	+	TAACGta	Gibberellin responsive element
AcGASA8	Aco002373	GARE	Oryza sativa	1588	-	taCGTGA	Gibberellin responsive element
AcGASA8	Aco002373	LRE	Nicotiana plumbaginifolia	812	-	agcCACGT	light responsive element
AcGASA8	Aco002373	LRE	Nicotiana plumbaginifolia	1589	+	ACGTGaca	light responsive element
AcGASA8	Aco002373	ABRE	Arabidopsis thaliana	813	-	gcCACGTg	ABA responsive element
AcGASA8	Aco002373	MBS	Arabidopsis thaliana	973	+	CAACTG	drought-inducibility responsive element
AcGASA8	Aco002373	ARE	Zea mays	490	+	AAACCA	anaerobic induction responsive element
AcGASA8	Aco002373	ARE	Zea mays	1060	+	AAACCA	anaerobic induction responsive element
AcGASA9	Aco004893	LRE	Petroselinum crispum	1629	+	AACCTaataa	light responsive element
AcGASA9	Aco004893	D1	Glycine max	159	-	gagaaACTGT	auxin responsive element
AcGASA9	Aco004893	D1	Glycine max	553	-	aagtcACTG	auxin responsive element
AcGASA9	Aco004893	LRE	Petroselinum crispum	106	+	TCCACaat	light responsive element
AcGASA9	Aco004893	ACGT motif	Phaseolus vulgaris	576	+	ACACAcctgaa	seed expression responsive element
AcGASA9	Aco004893	D3	Glycine max	846	-	tgcagaAAATA	auxin responsive element
AcGASA9	Aco004893	D3	Glycine max	1239	-	taaataAAATA	auxin responsive element
AcGASA9	Aco004893	D3	Glycine max	1645	-	atttgcAAATA	auxin responsive element
AcGASA9	Aco004893	LRE	Pisum sativum; Arabidopsis thaliana	1043	+	TGTGTgaagcatatg	light responsive element
AcGASA9	Aco004893	LTRE-1	Hordeum vulgare	71	-	tTTCGG	low-temperature responsive element
AcGASA9	Aco004893	LTRE-1	Hordeum vulgare	634	+	CCGAA	low-temperature responsive element
AcGASA9	Aco004893	GARE	Oryza sativa; Hordeum vulgare	55	-	aAAAGG	Gibberellin responsive element
AcGASA9	Aco004893	AACA motifs	Oryza sativa	1687	-	gtTTGTT	endosperm-specific expression
AcGASA9	Aco004893	AACA motifs	Oryza sativa	1924	+	AACAA	endosperm-specific expression
AcGASA9	Aco004893	AACA motifs	Oryza sativa	286	+	AACAAa	endosperm-specific expression
AcGASA9	Aco004893	GARE	Oryza sativa	15	-	taCTTTA	Gibberellin responsive element
AcGASA9	Aco004893	GARE	Oryza sativa	181	-	aaCGTTA	Gibberellin responsive element
AcGASA9	Aco004893	GARE	Oryza sativa	241	+	CAACGta	Gibberellin responsive element
AcGASA9	Aco004893	GARE	Oryza sativa	358	-	taCGTAA	Gibberellin responsive element
AcGASA9	Aco004893	GARE	Oryza sativa	500	-	taCGATA	Gibberellin responsive element
AcGASA9	Aco004893	MRE	Petroselinum crispum	1629	+	AACCTAA	light responsive element
AcGASA9	Aco004893	CGTCA-motif	Hordeum vulgare	764	-	CGTCA	MeJA responsive element
AcGASA9	Aco004893	TGACG-motif	Hordeum vulgare	764	+	TGACG	MeJA responsive element
AcGASA10	Aco008536	D1	Glycine max	32	+	ACAGTttcat	auxin responsive element
AcGASA10	Aco008536	LS7	Arabidopsis thaliana; Nicotiana tabacum	185	+	ACGGCacgga	salicylic acid-inducible element
AcGASA10	Aco008536	LS7	Arabidopsis thaliana; Nicotiana tabacum	326	-	tttgtGAAGT	salicylic acid-inducible element
AcGASA10	Aco008536	LS7	Arabidopsis thaliana; Nicotiana tabacum	386	-	tttctGATGT	salicylic acid-inducible element
AcGASA10	Aco008536	LS7	Arabidopsis thaliana; Nicotiana tabacum	1370	-	tccacCACGT	salicylic acid-inducible element
AcGASA10	Aco008536	LS7	Arabidopsis thaliana; Nicotiana tabacum	1788	-	catatGATGT	salicylic acid-inducible element
AcGASA10	Aco008536	ABRE	Arabidopsis thaliana	1372	-	cacCACGTca	ABA responsive element
AcGASA10	Aco008536	ABRE B	Zea mays	127	+	TCCACatttt	ABA responsive element
AcGASA10	Aco008536	ABRE B	Zea mays	239	+	TCCACggccc	ABA responsive element
AcGASA10	Aco008536	LRE	Petroselinum crispum	239	+	TCCACggccc	light responsive element
AcGASA10	Aco008536	DR5	Glycine max	699	+	CCTTTtctacc	auxin responsive element
AcGASA10	Aco008536	DR5	Glycine max	771	-	caaataAAAGG	auxin responsive element
AcGASA10	Aco008536	DR5	Glycine max	1773	-	aaaaaaAAAGG	auxin responsive element
AcGASA10	Aco008536	SURE-a	Hordeum vulgare	823	+	AAAACatagaccgatctgttgcaga	sugar responsive element
AcGASA10	Aco008536	ERE	Lycopersicon esculentum; Dianthus caryophyllus; Lycopersicon chilense	78	+	aaTTCAAa	ethylene responsive element
AcGASA10	Aco008536	ERE	Lycopersicon esculentum; Dianthus caryophyllus; Lycopersicon chilense	103	-	tTTGAAac	ethylene responsive element
AcGASA10	Aco008536	ERE	Lycopersicon esculentum; Dianthus caryophyllus; Lycopersicon chilense	498	-	tTTGAAtt	ethylene responsive element
AcGASA10	Aco008536	ERE	Lycopersicon esculentum; Dianthus caryophyllus; Lycopersicon chilense	580	+	atTTCAAa	ethylene responsive element
AcGASA10	Aco008536	ERE	Lycopersicon esculentum; Dianthus caryophyllus; Lycopersicon chilense	723	+	atTTCAAa	ethylene responsive element
AcGASA10	Aco008536	ERE	Lycopersicon esculentum; Dianthus caryophyllus; Lycopersicon chilense	731	+	atTTCAAa	ethylene responsive element
AcGASA10	Aco008536	D4	Glycine max	1411	-	acatCACTA	auxin responsive element
AcGASA10	Aco008536	GARE-motif	Brassica oleracea	837	+	TCTGTTG	Gibberellin responsive element
AcGASA10	Aco008536	GCN4_motif	Oryza sativa	1541	+	TGAGTCA	endosperm-specific expression
AcGASA10	Aco008536	GCN4_motif	Oryza sativa	1942	+	TGAGTCA	endosperm-specific expression
AcGASA10	Aco008536	CGTCA-motif	Hordeum vulgare	1377	+	CGTCA	MeJA responsive element
AcGASA11	Aco000098	LS7	Arabidopsis thaliana; Nicotiana tabacum	443	+	ACGTGatagt	salicylic acid-inducible element
AcGASA11	Aco000098	LS7	Arabidopsis thaliana; Nicotiana tabacum	1868	-	tttctGACCT	salicylic acid-inducible element
AcGASA11	Aco000098	LS7	Arabidopsis thaliana; Nicotiana tabacum	1874	+	ACCTCaatga	salicylic acid-inducible element
AcGASA11	Aco000098	MotifI and motif III (S000291)	Oryza sativa	1031	+	AGTACgttaa	ABA responsive element
AcGASA11	Aco000098	ABRE A	Zea mays	951	+	GCCACgtgcc	ABA responsive element
AcGASA11	Aco000098	AACA motif	Oryza sativa	1598	+	CAACAatttataat	endosperm-specific expression
AcGASA11	Aco000098	C2	Glycine max	30	+	AATAAgaacaacaacaaagg	auxin responsive element
AcGASA11	Aco000098	C2	Glycine max	1165	+	AATAAttataatagttgaaa	auxin responsive element
AcGASA11	Aco000098	SRE	Arabidopsis thaliana	367	+	TTATCc	sugar responsive element
AcGASA11	Aco000098	SRE	Arabidopsis thaliana	1290	-	gGATAA	sugar responsive element
AcGASA11	Aco000098	AACA motifs	Oryza sativa	42	+	AACAAag	endosperm-specific expression
AcGASA11	Aco000098	AACA motifs	Oryza sativa	507	+	AACAAat	endosperm-specific expression
AcGASA11	Aco000098	AACA motifs	Oryza sativa	740	-	ggTTGTT	endosperm-specific expression
AcGASA11	Aco000098	AACA motifs	Oryza sativa	1390	-	ttTTGTT	endosperm-specific expression
AcGASA11	Aco000098	GARE	Oryza sativa	315	-	taAGTTA	Gibberellin responsive element
AcGASA11	Aco000098	GARE	Oryza sativa	442	-	taCGTGA	Gibberellin responsive element
AcGASA11	Aco000098	GARE	Oryza sativa	682	+	TAATGta	Gibberellin responsive element
AcGASA11	Aco000098	GARE	Oryza sativa	1033	-	taCGTTA	Gibberellin responsive element
AcGASA11	Aco000098	GARE	Oryza sativa	1564	+	TAATGta	Gibberellin responsive element
AcGASA11	Aco000098	ABRE	Arabidopsis thaliana	951	-	gcCACGTg	ABA responsive element
AcGASA11	Aco000098	ABRE	Arabidopsis thaliana	953	+	cACGTG	ABA responsive element
AcGASA11	Aco000098	G-Box	Pisum sativum	953	+	CACGTG	light responsive element
AcGASA11	Aco000098	G-box	Zea mays	421	+	CACGTC	light responsive element
AcGASA11	Aco000098	G-box	Arabidopsis thaliana	442	+	TACGTG	light responsive element
AcGASA11	Aco000098	G-box	Arabidopsis thaliana	953	+	CACGTG	light responsive element
AcGASA11	Aco000098	CGTCA-motif	Hordeum vulgare	423	+	CGTCA	MeJA responsive element
AcGASA11	Aco000098	LTR	Hordeum vulgare	1022	+	CCGAAA	low-temperature responsive element
AcGASA11	Aco000098	LTR	Hordeum vulgare	1043	-	CCGAAA	low-temperature responsive element
AcGASA12	Aco003244	LRE	Petroselinum crispum	550	+	AACCTagttt	light responsive element
AcGASA12	Aco003244	LRE	Petroselinum crispum	1370	+	AACCTatttt	light responsive element
AcGASA12	Aco003244	LRE	Petroselinum crispum	1578	-	atgccAGGTT	light responsive element
AcGASA12	Aco003244	LRE	Petroselinum crispum	1787	-	ggagtAGGTT	light responsive element
AcGASA12	Aco003244	D1	Glycine max	224	+	ACAGTgattt	auxin responsive element
AcGASA12	Aco003244	LS7	Arabidopsis thaliana; Nicotiana tabacum	260	+	ACGCCataat	salicylic acid-inducible element
AcGASA12	Aco003244	LS7	Arabidopsis thaliana; Nicotiana tabacum	661	+	AGGTCttagg	salicylic acid-inducible element
AcGASA12	Aco003244	LS7	Arabidopsis thaliana; Nicotiana tabacum	1079	+	AAGTCagata	salicylic acid-inducible element
AcGASA12	Aco003244	LS7	Arabidopsis thaliana; Nicotiana tabacum	1216	-	gctgtGACAT	salicylic acid-inducible element
AcGASA12	Aco003244	LS7	Arabidopsis thaliana; Nicotiana tabacum	1934	+	ACTTCatcta	salicylic acid-inducible element
AcGASA12	Aco003244	DR5	Glycine max	215	+	CCTTTtgcgac	auxin responsive element
AcGASA12	Aco003244	DR5	Glycine max	1351	-	caaagaAAAGG	auxin responsive element
AcGASA12	Aco003244	DR5	Glycine max	1447	+	CCTTTtttaac	auxin responsive element
AcGASA12	Aco003244	DR5	Glycine max	1509	-	aggaaaAAAGG	auxin responsive element
AcGASA12	Aco003244	TGACG-motif	Hordeum vulgare	779	-	TGACG	MeJA responsive element
AcGASA12	Aco003244	ABRE	Arabidopsis thaliana	1045	+	ACGTG	ABA responsive element
AcGASA12	Aco003244	TC-rich repeats	Nicotiana tabacum	835	-	GTTTTCTTAC	defense and stress responsive element
AcGASA12	Aco003244	TC-rich repeats	Nicotiana tabacum	1495	-	GTTTTCTTAC	defense and stress responsive element
AcGASA12	Aco003244	ARE	Zea mays	87	-	AAACCA	anaerobic induction responsive element
AcGASA12	Aco003244	ARE	Zea mays	1546	+	AAACCA	anaerobic induction responsive element
AcGASA12	Aco003244	P-box	Oryza sativa	215	+	CCTTTTG	Gibberellin responsive element
AcGASA12	Aco003244	P-box	Oryza sativa	1557	+	CCTTTTG	Gibberellin responsive element
AcGASA12	Aco003244	LTR	Hordeum vulgare	143	-	CCGAAA	low-temperature responsive element
AcGASA13	Aco015815	LS7	Arabidopsis thaliana; Nicotiana tabacum	660	+	ACGTCttata	salicylic acid-inducible element
AcGASA13	Aco015815	LS7	Arabidopsis thaliana; Nicotiana tabacum	814	-	tcgaaGGCGT	salicylic acid-inducible element
AcGASA13	Aco015815	LS7	Arabidopsis thaliana; Nicotiana tabacum	920	+	ACCTCatatg	salicylic acid-inducible element
AcGASA13	Aco015815	LS7	Arabidopsis thaliana; Nicotiana tabacum	1168	-	tgtacGATGT	salicylic acid-inducible element
AcGASA13	Aco015815	LS7	Arabidopsis thaliana; Nicotiana tabacum	1303	+	GCGTCatcgt	salicylic acid-inducible element
AcGASA13	Aco015815	LS7	Arabidopsis thaliana; Nicotiana tabacum	1801	-	acttcGACG	salicylic acid-inducible element
AcGASA13	Aco015815	D3	Glycine max	743	-	tttaccAAATA	auxin responsive element
AcGASA13	Aco015815	D3	Glycine max	824	-	atacccAAATA	auxin responsive element
AcGASA13	Aco015815	D3	Glycine max	1828	+	TATTTgcgca	auxin responsive element
AcGASA13	Aco015815	MBS	Arabidopsis thaliana	780	-	CAACTG	drought-inducibility responsive element
AcGASA13	Aco015815	CGTCA-motif	Hordeum vulgare	1304	+	CGTCA	MeJA responsive element
AcGASA13	Aco015815	GATA-motif	Arabidopsis thaliana	2	-	AAGATAAGATT	light responsive element
AcGASA13	Aco015815	GT1-motif	Solanum tuberosum	1283	-	GTGTGTGAA	light responsive element
AcGASA14	Aco015632	LRE	Petroselinum crispum	810	+	AACCTaagg	light responsive element
AcGASA14	Aco015632	LS7	Arabidopsis thaliana; Nicotiana tabacum	170	-	tgtttGACTT	salicylic acid-inducible element
AcGASA14	Aco015632	LS7	Arabidopsis thaliana; Nicotiana tabacum	195	-	actttGACTT	salicylic acid-inducible element
AcGASA14	Aco015632	LS7	Arabidopsis thaliana; Nicotiana tabacum	267	+	AAGTCaaagt	salicylic acid-inducible element
AcGASA14	Aco015632	LS7	Arabidopsis thaliana; Nicotiana tabacum	694	+	ACGTGgtaca	salicylic acid-inducible element
AcGASA14	Aco015632	LS7	Arabidopsis thaliana; Nicotiana tabacum	758	-	ttgaaGACGT	salicylic acid-inducible element
AcGASA14	Aco015632	LS7	Arabidopsis thaliana; Nicotiana tabacum	1518	+	ATGTCatcta	salicylic acid-inducible element
AcGASA14	Aco015632	ABRE A	Zea mays	632	+	GCCACttggt	ABA responsive element
AcGASA14	Aco015632	ABRE A	Zea mays	1213	-	cgctaGTGGC	ABA responsive element
AcGASA14	Aco015632	ABRE A	Zea mays	1860	-	tacaaGTGGC	ABA responsive element
AcGASA14	Aco015632	ABRE	Arabidopsis thaliana	692	+	acACGTGgta	ABA responsive element
AcGASA14	Aco015632	ABRE	Arabidopsis thaliana	762	+	agACGTGgag	ABA responsive element
AcGASA14	Aco015632	LRE	Petroselinum crispum	761	-	aagacGTGGA	light responsive element
AcGASA14	Aco015632	LRE	Petroselinum crispum	844	+	TCCACgatga	light responsive element
AcGASA14	Aco015632	DR5	Glycine max	404	+	CCTTTtttttt	auxin responsive element
AcGASA14	Aco015632	SRE	Arabidopsis thaliana	570	-	gGATAA	sugar responsive element
AcGASA14	Aco015632	SRE	Arabidopsis thaliana	1910	+	TTATCc	sugar responsive element
AcGASA14	Aco015632	GARE	Oryza sativa	226	+	TAACAaa	Gibberellin responsive element
AcGASA14	Aco015632	GARE	Oryza sativa	1078	+	TAACAgc	Gibberellin responsive element
AcGASA14	Aco015632	GARE	Oryza sativa	12	-	taCGATA	Gibberellin responsive element
AcGASA14	Aco015632	GARE	Oryza sativa	221	-	taCTTTA	Gibberellin responsive element
AcGASA14	Aco015632	GARE	Oryza sativa	599	-	taCTTTA	Gibberellin responsive element
AcGASA14	Aco015632	GARE	Oryza sativa	809	+	TAACCta	Gibberellin responsive element
AcGASA14	Aco015632	LRE	Nicotiana plumbaginifolia	694	+	ACGTGgta	light responsive element
AcGASA14	Aco015632	ERE	Lycopersicon esculentum; Dianthus caryophyllus; Lycopersicon chilense	1435	+	acTTCAAa	ethylene responsive element
AcGASA14	Aco015632	ERE	Lycopersicon esculentum; Dianthus caryophyllus; Lycopersicon chilense	1472	-	tTTGAAat	ethylene responsive element
AcGASA14	Aco015632	ERE	Lycopersicon esculentum; Dianthus caryophyllus; Lycopersicon chilense	1553	+	agTTCAAa	ethylene responsive element
AcGASA14	Aco015632	ERE	Lycopersicon esculentum; Dianthus caryophyllus; Lycopersicon chilense	263	-	tTTGAAgt	ethylene responsive element
AcGASA14	Aco015632	ERE	Lycopersicon esculentum; Dianthus caryophyllus; Lycopersicon chilense	331	-	tTTGAAag	ethylene responsive element
AcGASA14	Aco015632	TGACG-motif	Hordeum vulgare	669	+	TGACG	MeJA responsive element
AcGASA14	Aco015632	MBS	Arabidopsis thaliana	585	+	CAACTG	drought-inducibility responsive element
AcGASA14	Aco015632	MBS	Arabidopsis thaliana	1175	-	CAACTG	drought-inducibility responsive element
AcGASA14	Aco015632	TC-rich repeats	Nicotiana tabacum	984	+	GTTTTCTTAC	defense and stress responsive element
AcGASA14	Aco015632	ARE	Zea mays	740	-	AAACCA	anaerobic induction responsive element
AcGASA15	Aco010336	LS7	Arabidopsis thaliana; Nicotiana tabacum	249	-	tatttGACTT	salicylic acid-inducible element
AcGASA15	Aco010336	LS7	Arabidopsis thaliana; Nicotiana tabacum	966	-	tctaaGACGA	salicylic acid-inducible element
AcGASA15	Aco010336	LS7	Arabidopsis thaliana; Nicotiana tabacum	1282	-	tttctGAGGT	salicylic acid-inducible element
AcGASA15	Aco010336	LS7	Arabidopsis thaliana; Nicotiana tabacum	1462	+	ACATCatcca	salicylic acid-inducible element
AcGASA15	Aco010336	LS7	Arabidopsis thaliana; Nicotiana tabacum	1514	+	ACGTCatgag	salicylic acid-inducible element
AcGASA15	Aco010336	LS7	Arabidopsis thaliana; Nicotiana tabacum	1699	-	tgtttCACGT	salicylic acid-inducible element
AcGASA15	Aco010336	ABRE	Arabidopsis thaliana	1510	-	gtcCACGTca	ABA responsive element
AcGASA15	Aco010336	ABRE B	Zea mays	545	+	TCCACctgtt	ABA responsive element
AcGASA15	Aco010336	ABRE B	Zea mays	1511	+	TCCACgtcat	ABA responsive element
AcGASA15	Aco010336	LRE	Petroselinum crispum	545	+	TCCACctgtt	light responsive element
AcGASA15	Aco010336	LRE	Petroselinum crispum	1511	+	TCCACgtcat	light responsive element
AcGASA15	Aco010336	D3	Glycine max	561	+	TATTTttttaa	auxin responsive element
AcGASA15	Aco010336	D3	Glycine max	724	-	taaaaaAAATA	auxin responsive element
AcGASA15	Aco010336	D3	Glycine max	1351	+	TATTTtttaaa	auxin responsive element
AcGASA15	Aco010336	D3	Glycine max	1943	+	TATTTgctaac	auxin responsive element
AcGASA15	Aco010336	SRE	Nicotiana tabacum	1151	+	TGGTAtccgagac	defense and stress responsive element
AcGASA15	Aco010336	SURE	Arabidopsis thaliana	471	-	GTATC	sulfur responsive element
AcGASA15	Aco010336	SURE	Arabidopsis thaliana	552	-	GTTTC	sulfur responsive element
AcGASA15	Aco010336	SURE	Arabidopsis thaliana	774	+	GAGAC	sulfur responsive element
AcGASA15	Aco010336	SURE	Arabidopsis thaliana	941	-	GTCTC	sulfur responsive element
AcGASA15	Aco010336	SURE	Arabidopsis thaliana	1159	+	GAGAC	sulfur responsive element
AcGASA15	Aco010336	LTRE-1	Hordeum vulgare	411	+	CCGAAa	low-temperature responsive element
AcGASA15	Aco010336	SRE	Arabidopsis thaliana	326	+	TTATC	sugar responsive element
AcGASA15	Aco010336	GARE	Oryza sativa	815	-	gcTGTTA	Gibberellin responsive element
AcGASA15	Aco010336	GARE	Oryza sativa	1346	-	taTGTTA	Gibberellin responsive element
AcGASA15	Aco010336	GARE	Oryza sativa	1669	+	TAACAga	Gibberellin responsive element
AcGASA15	Aco010336	GARE	Oryza sativa	1711	-	tgTGTTA	Gibberellin responsive element
AcGASA15	Aco010336	TGACG-motif	Hordeum vulgare	1515	-	TGACG	MeJA responsive element
AcGASA15	Aco010336	ARE	Zea mays	873	+	AAACCA	anaerobic induction responsive element
AcGASA15	Aco010336	TC-rich repeats	Nicotiana tabacum	1265	+	GTTTTCTTAC	defense and stress responsive element
AcGASA15	Aco010336	TC-rich repeats	Nicotiana tabacum	1663	+	ATTCTCTAAC	defense and stress responsive element
