# Supplementary material for: Genome-Wide Identification and Characterization of Gibberellic Acid-Stimulated Arabidopsis Gene Family in Pineapple (Ananas comosus)
Source: Int J Mol Sci. 2023 Dec 2;24(23):17063. doi: 10.3390/ijms242317063 (PMC10706908; doi:10.3390/ijms242317063)
Supplement: Supplementary file 1 [file ijms-24-17063-s001.zip › Table S11.xlsx]

## Sheet: Sheet1
Table S11: Raw data for AcGASA gene expression analysis under different plant hormone treatments
Gene name	Plant hormones	0h	0h	0h	6h	6h	6h	12h	12h	12h	24h	24h	24h	36h	36h	36h	48h	48h	48h
AcGASA1	NAA	1.10363	0.863862	1.0489	0.202613	0.163904	0.196942	0.427434	0.458112	0.360612	0.303054	0.305338	0.302895	0.341687	0.33897	0.306359	0.283213	0.299929	0.289712
	MeJA	1.13495	0.882291	0.998644	0.375508	0.428581	0.3815	0.3189	0.356188	0.264692	0.657237	0.772772	0.579762	0.522359	0.530292	0.566708	0.318776	0.258927	0.321958
	IAA	0.77707	1.03919	1.23836	0.084321	0.065038	0.060625	1.00304	1.16122	1.10533	0.451634	0.500821	0.575351	7.25997	6.36191	7.16995	0.219507	0.193242	0.151499
	GA	1.03396	0.803608	1.20352	0.390734	0.185257	0.250739	0.617409	0.488328	0.359128	0.364773	0.340345	0.340511	1.31981	1.62488	1.19244	0.279797	0.217224	0.204086
	ABA	0.779541	1.14046	1.12481	0.160104	0.273572	0.283219	2.2202	2.98249	2.5964	1.28068	1.33141	1.47729	0.803693	1.33367	0.879891	1.58953	1.71337	1.70154
AcGASA2	NAA	1.08738	0.906438	1.01456	0.272599	0.233169	0.268797	16.8966	17.6238	18.6287	1.24891	1.20099	1.52016	102.191	104.88	100.744	125.324	129.081	126.363
	MeJA	1.19466	1.1012	1.14275	10.6993	10.6573	12.8542	1.05509	0.893586	0.886293	46.5455	40.6075	45.8223	22.0213	22.2786	20.6431	10.0351	11.7497	10.2287
	IAA	0.950622	1.12618	0.934077	0.107235	0.154305	0.125418	0.387013	0.411023	0.437481	1.10801	1.28162	1.12775	6.86213	5.81048	6.50087	12.6963	12.3229	12.1001
	GA	1.05648	0.977961	0.967875	0.770993	0.773603	0.864697	6.18673	7.63844	6.2211	11.2214	11.4849	11.3811	21.3808	21.541	20.9306	140.216	142.915	141.467
	ABA	0.923336	1.05225	1.02925	6.8295	6.10457	5.48432	36.2928	36.453	36.7201	274.577	267.783	242.369	4655.71	3936.99	5141.19	111.629	109.888	111.863
AcGASA3	NAA	1.02519	1.06133	0.919061	0.154745	0.166427	0.145695	2.19379	1.66306	2.31363	0.332517	0.247978	0.391971	15.4338	15.8194	16.1612	10.4631	10.294	11.1143
	MeJA	1.04845	0.980623	0.97264	0.269536	0.294677	0.260061	0.253437	0.303537	0.257493	0.479657	0.48361	0.502966	0.61007	0.596632	0.708686	0.529101	0.522067	0.493669
	IAA	0.964835	0.987219	1.04987	0.118045	0.100654	0.098322	0.81897	0.86047	0.989215	0.692517	0.821481	0.554109	6.74972	7.83232	6.54742	1.8648	2.08289	2.07142
	GA	1.09069	1.01439	0.903847	0.474255	0.514618	0.429022	0.717668	0.656015	0.619568	0.726044	0.873568	0.626329	1.54887	1.62658	1.61657	8.7444	8.20141	8.37113
	ABA	1.15309	0.836906	1.03624	0.976588	0.932447	0.820064	7.30769	7.90309	6.26234	11.5957	11.9368	12.5454	219.12	213.303	222.84	10.4073	10.7055	10.3331
AcGASA4	NAA	0.852351	1.12253	1.04516	0.175002	0.157967	0.153588	1.08411	1.33155	1.14899	2.53854	2.38014	2.36094	9.79902	10.2847	9.5797	63.5463	58.0739	59.5858
	MeJA	1.02196	1.07542	0.909884	0.187989	0.188143	0.214926	0.264039	0.324814	0.373113	0.493515	0.410175	0.494336	0.50341	0.412071	0.556046	0.160424	0.202658	0.181303
	IAA	1.02624	0.922731	1.05603	0.709347	0.767637	0.806026	1.78144	2.10847	1.84778	15.1597	15.7035	14.5727	14.6929	14.214	13.7395	9.49938	10.1966	10.8929
	GA	0.905773	1.03999	1.06157	0.1426	0.122076	0.192087	0.991817	0.92206	0.908704	0.722608	0.600155	0.614399	2.26249	2.16137	2.22759	0.681952	0.768006	0.850069
	ABA	1.08239	0.922035	1.00201	0.324741	0.372435	0.3551	1.89524	2.26647	1.98479	1.08869	1.19456	1.0805	0.201329	0.215779	0.137125	12.1574	13.2678	13.7818
AcGASA5	NAA	1.01502	1.05625	0.93274	0.0912816	0.0985137	0.0712027	0.275343	0.292602	0.380411	0.0633505	0.0634379	0.0625645	0.202433	0.245969	0.278492	0.312283	0.236666	0.363968
	MeJA	1.06683	0.866502	1.08177	0.234762	0.280131	0.225617	0.19573	0.208142	0.231869	0.632795	0.605802	0.647256	0.628078	0.591109	0.645089	0.18087	0.207161	0.1939
	IAA	1.10037	0.954667	0.951942	0.0959525	0.107453	0.0986226	0.829718	0.834171	0.998711	0.817079	0.745626	0.630962	3.13188	3.41255	3.85658	0.281414	0.285375	0.275406
	GA	0.873305	1.03363	1.10782	1.97426	1.79737	1.73868	1.89515	1.75165	1.77761	1.96423	1.88422	1.96779	1.60253	1.04257	1.37568	3.29739	2.90746	3.21716
	ABA	1.05701	0.84674	1.1173	0.0463036	0.0419602	0.0375555	1.65239	1.88631	1.05726	1.02257	0.829475	0.702949	0.310983	0.236836	0.220976	0.277921	0.321856	0.360337
AcGASA6	NAA	1.08113	0.8965	1.03174	0.158881	0.169875	0.183161	2.73669	2.08012	3.39804	13.0469	12.8643	12.4541	5.11932	5.21772	5.266	15.0941	14.3962	14.6137
	MeJA	1.017	1.10191	0.89235	12.2594	11.116	11.8804	2.11392	2.74754	2.51694	74.427	77.3468	75.7515	18.6373	19.1992	20.1373	1.51111	1.3155	1.21808
	IAA	0.875446	1.13005	1.01082	0.222299	0.231303	0.224954	1.43294	1.47664	1.41717	5.29617	5.55805	5.65375	13.4594	11.4479	12.0134	2.67202	3.55028	3.54275
	GA	1.13024	0.984844	0.89838	0.194183	0.168302	0.194851	1.02129	0.989627	0.994339	2.18511	2.94671	2.80906	4.83443	4.0514	4.34218	4.47062	5.50188	5.18415
	ABA	0.997135	0.998529	1.00435	0.276615	0.207294	0.298485	0.470601	0.530705	0.543697	3.11568	2.53571	2.91277	4.86383	4.8766	4.56605	1.14129	0.993554	0.933032
AcGASA7	NAA	1.29356	0.758818	1.01877	6.43226	6.2068	5.06466	10.9162	11.7907	10.9357	13.709	12.2463	12.3681	7.71731	6.69553	7.10913	3.88419	3.96446	3.9678
	MeJA	1.04942	0.887785	1.07335	0.521881	0.555639	0.551801	0.390777	0.481027	0.346266	0.666844	0.804086	0.644129	0.65948	0.49537	0.599257	0.185012	0.1177	0.126754
	IAA	1.02176	0.951467	1.02863	1.45291	1.31672	1.25486	5.86225	4.66565	5.47589	2.39128	2.83101	2.95123	11.4975	11.4479	10.8652	5.49526	6.02625	5.34201
	GA	1.02158	0.975693	1.00326	0.0426149	0.0358453	0.0602665	0.545128	0.556582	0.495903	1.22662	1.29316	1.09642	1.65717	1.64748	1.59684	0.693264	0.83547	0.869677
	ABA	0.934953	1.28527	0.832179	2.41188	2.62296	2.055	3.65684	2.99593	3.26465	16.0836	16.0392	15.2318	11.8071	11.0515	11.8071	29.8003	30.322	28.2031
AcGASA8	NAA	1.09212	0.811925	1.12775	0.194739	0.12791	0.13709	0.136664	0.130741	0.124549	0.185371	0.164686	0.170494	0.0677843	0.109342	0.0771459	0.106332	0.0859884	0.115021
	MeJA	0.873574	1.07436	1.06549	0.306771	0.315369	0.235855	0.237516	0.216754	0.198105	0.289655	0.219517	0.370657	0.37395	0.411887	0.384304	0.082191	0.107402	0.16482
	IAA	1.12887	1.01462	0.873071	0.0811871	0.12832	0.0989788	0.182171	0.193959	0.212248	0.573608	0.619826	0.510567	3.91655	4.53426	4.4656	0.106479	0.136098	0.114524
	GA	0.838525	1.08591	1.09822	1.7044	1.65097	1.71922	0.417075	0.434758	0.333894	0.298148	0.319547	0.273282	0.822439	0.942155	0.820193	0.262951	0.261135	0.266425
	ABA	1.02999	0.93844	1.03457	0.145731	0.150004	0.179828	0.254644	0.208033	0.225303	0.356588	0.348937	0.21834	0.289433	0.3773	0.259211	0.124435	0.115363	0.106785
AcGASA9	NAA	0.881788	1.05592	1.074	0.140589	0.108752	0.151728	0.414578	0.254877	0.438444	0.157023	0.16741	0.162832	0.186256	0.191675	0.159323	0.290313	0.324498	0.216909
	MeJA	1.07885	0.976677	0.949046	1.02831	0.960587	1.06584	0.239474	0.318875	0.208474	0.866453	0.762283	0.816163	0.732779	0.743008	0.853492	0.154783	0.146848	0.168684
	IAA	0.852932	0.94466	1.24111	0.0796833	0.114881	0.0904381	0.252898	0.38802	0.224705	0.174015	0.201875	0.229995	1.02655	0.969631	1.17783	0.109021	0.134583	0.118202
	GA	1.15551	0.705001	1.22754	19.9364	19.2982	19.1167	2.29869	2.33078	1.8546	2.21899	2.67178	3.28935	6.51148	6.23249	6.07451	1.15916	1.38203	1.20312
	ABA	1.00923	0.961435	1.03059	0.063395	0.0385841	0.0785912	0.830248	0.641489	1.04162	1.11132	1.04564	1.50443	0.0756	0.0955412	0.0747856	0.435921	0.516823	0.281531
AcGASA10	NAA	0.810871	1.14953	1.07282	0.146211	0.14241	0.132327	0.339724	0.307449	0.356371	0.504517	0.557789	0.405747	0.379399	0.375959	0.382574	0.520207	0.557427	0.418549
	MeJA	0.91573	1.13171	0.964934	0.305045	0.31882	0.317142	0.24355	0.259254	0.259653	0.0490455	0.0487401	0.048069	0.338038	0.289898	0.252708	0.0735443	0.0967069	0.099666
	IAA	1.0195	0.933129	1.05116	0.1156	0.095067	0.0855694	0.96735	0.942186	1.0115	0.863439	1.15758	0.769926	7.50319	8.0716	8.16289	0.469077	0.553485	0.481568
	GA	0.966038	0.873409	1.18519	1.07826	0.975995	0.932919	0.765696	0.988855	0.872865	0.865899	0.981727	0.824984	1.22883	1.61117	1.3117	0.894177	0.901416	0.907663
	ABA	0.938268	1.02674	1.03804	0.282876	0.2117	0.217652	0.798345	1.00587	0.74504	0.870951	1.12079	0.70476	1.0686	1.41359	1.47605	2.07088	2.12117	2.15048
AcGASA11	NAA	1.00696	0.946738	1.04896	0.254575	0.211627	0.186025	0.142698	0.17418	0.161612	0.0850685	0.118427	0.126676	0.0456825	0.057153	0.0482481	0.0628337	0.0490433	0.0384776
	MeJA	0.886474	1.05863	1.06559	0.0646926	0.0625166	0.0638302	0.165189	0.178782	0.174501	0.182883	0.234442	0.284231	0.335568	0.39539	0.432403	0.0620859	0.0540861	0.0971613
	IAA	0.986213	0.971423	1.04381	0.248726	0.26571	0.227627	0.333346	0.409878	0.398968	0.341598	0.38067	0.456297	1.34753	1.09454	1.36435	0.162322	0.13123	0.153823
	GA	0.995161	0.997104	0.961259	1.32299	1.48353	1.52437	0.285101	0.288223	0.25897	0.126657	0.11997	0.11144	0.28184	0.3594	0.356313	0.101851	0.0921784	0.122326
	ABA	1.01526	0.811557	1.21367	0.273701	0.209617	0.174	0.245653	0.239431	0.281482	0.204141	0.297512	0.303716	3.07638	2.17132	2.37735	0.0647724	0.0878668	0.0906365
AcGASA12	NAA	1.15226	1.06119	0.817814	0.449082	0.492535	0.481314	3.80421	4.07726	3.47896	2.08118	2.81584	2.59717	2.69839	2.75922	2.61762	2.1251	1.91844	1.60836
	MeJA	1.15959	0.92648	0.930811	0.148475	0.239347	0.272665	0.303244	0.237103	0.179386	0.656041	0.501986	0.544915	0.431103	0.294223	0.48862	0.0525193	0.0555176	0.0707605
	IAA	1.06657	0.964333	0.972261	1.1107	1.17847	1.13889	1.49124	1.80219	1.5106	2.45852	2.52893	2.38049	3.0261	2.74627	2.98446	1.25487	1.54116	1.78767
	GA	1.0913	1.01822	0.899936	0.117846	0.188975	0.164513	4.64648	6.4987	5.54102	14.7771	12.3674	11.3825	3.85553	3.48724	3.32208	0.970868	1.09874	0.948889
	ABA	1.02624	1.00251	0.948536	64.8422	64.317	64.3165	46.9468	46.6462	47.9525	28.4243	28.8217	28.7881	80.0608	79.8773	80.6311	19.6048	19.5448	20.7031
AcGASA13	NAA	1.14092	0.818682	1.0706	0.0983173	0.117226	0.139793	0.271313	0.349605	0.322967	0.0707558	0.0678735	0.0741678	0.118203	0.126687	0.11807	0.140652	0.150748	0.103872
	MeJA	1.16073	0.993302	0.867334	0.0279266	0.0453989	0.0807087	0.0523235	0.0262074	0.0322651	0.527082	0.505636	0.475879	0.285411	0.193593	0.334741	0.0444974	0.028696	0.0311618
	IAA	1.00229	1.0093	0.988527	0.104602	0.0872698	0.0981836	0.596861	0.639427	0.881463	0.366988	0.560443	0.480248	3.19648	3.10244	3.21678	0.173646	0.220212	0.218606
	GA	1.02011	1.07481	1.05269	1.21634	1.3522	1.34286	0.693746	0.483206	0.665672	0.294661	0.385981	0.390233	0.485311	0.352631	0.37794	0.120627	0.22513	0.170617
	ABA	0.802677	1.24277	1.00247	0.384682	0.36449	0.39065	2.64323	2.83294	2.78182	1.57238	1.31026	1.46709	1.29793	1.37949	1.47851	1.18108	0.978322	0.944799
AcGASA14	NAA	0.904362	1.16426	0.949746	0.114324	0.125942	0.11525	0.193823	0.155404	0.219728	0.248832	0.252131	0.259219	0.255201	0.25555	0.278158	0.32532	0.329861	0.324687
	MeJA	0.914825	1.00303	1.08981	0.250289	0.258966	0.225759	0.35211	0.3017	0.41702	0.331254	0.325242	0.317777	0.477702	0.388015	0.536063	0.407409	0.38205	0.334114
	IAA	1.20199	0.887173	0.937758	0.251287	0.213855	0.18808	0.681435	0.658223	0.87405	0.628354	0.600203	0.775897	3.91766	4.16984	4.5186	0.376212	0.363877	0.338425
	GA	0.885913	1.02361	1.10274	1.38961	1.17847	1.31419	0.578355	0.744349	0.699604	0.669916	0.684149	0.496793	1.03219	1.20719	1.18485	0.553952	0.669131	0.795101
	ABA	0.995868	0.989909	1.01439	0.238244	0.197406	0.211764	0.328759	0.371174	0.314306	0.608949	0.765471	0.682205	1.40706	1.58175	1.719	0.399174	0.389548	0.355957
AcGASA15	NAA	0.849743	1.1193	1.05139	2.68922	3.03376	2.17218	68.8245	68.4778	68.8267	165.992	164.68	166.356	195.945	194.425	194.349	889.948	875.295	888.288
	MeJA	0.906962	0.99914	1.10353	0.135529	0.145256	0.183643	0.230553	0.264836	0.215113	0.418991	0.464397	0.469559	9.1513	9.10843	8.73739	36.3643	38.2356	37.9799
	IAA	0.952846	0.979331	1.07164	0.802448	0.827606	0.733592	6.1868	6.13083	6.26531	56.3917	55.5405	57.2862	270.9	271.987	272.939	257.192	255.901	253.412
	GA	1.08411	0.987425	0.934161	0.207181	0.192214	0.198102	1.83255	1.7132	1.85577	8.60536	8.69301	7.53902	17.0218	15.1446	15.8121	18.8254	19.5568	19.5458
	ABA	1.04385	0.989001	0.968648	0.942956	1.01826	0.975571	5.54318	5.34087	6.31715	31.9601	32.1635	32.4294	17.4743	17.9154	18.8707	46.8904	46.2419	45.7255
