# Supplementary figures and images for: Genome-Wide Identification and Characterization of Gibberellic Acid-Stimulated Arabidopsis Gene Family in Pineapple (Ananas comosus)
Source: MDPI journal article supplement (doi:10.3390/ijms242317063), 2023-12-02

Figure S1: Featured motifs of AcGASA proteins.

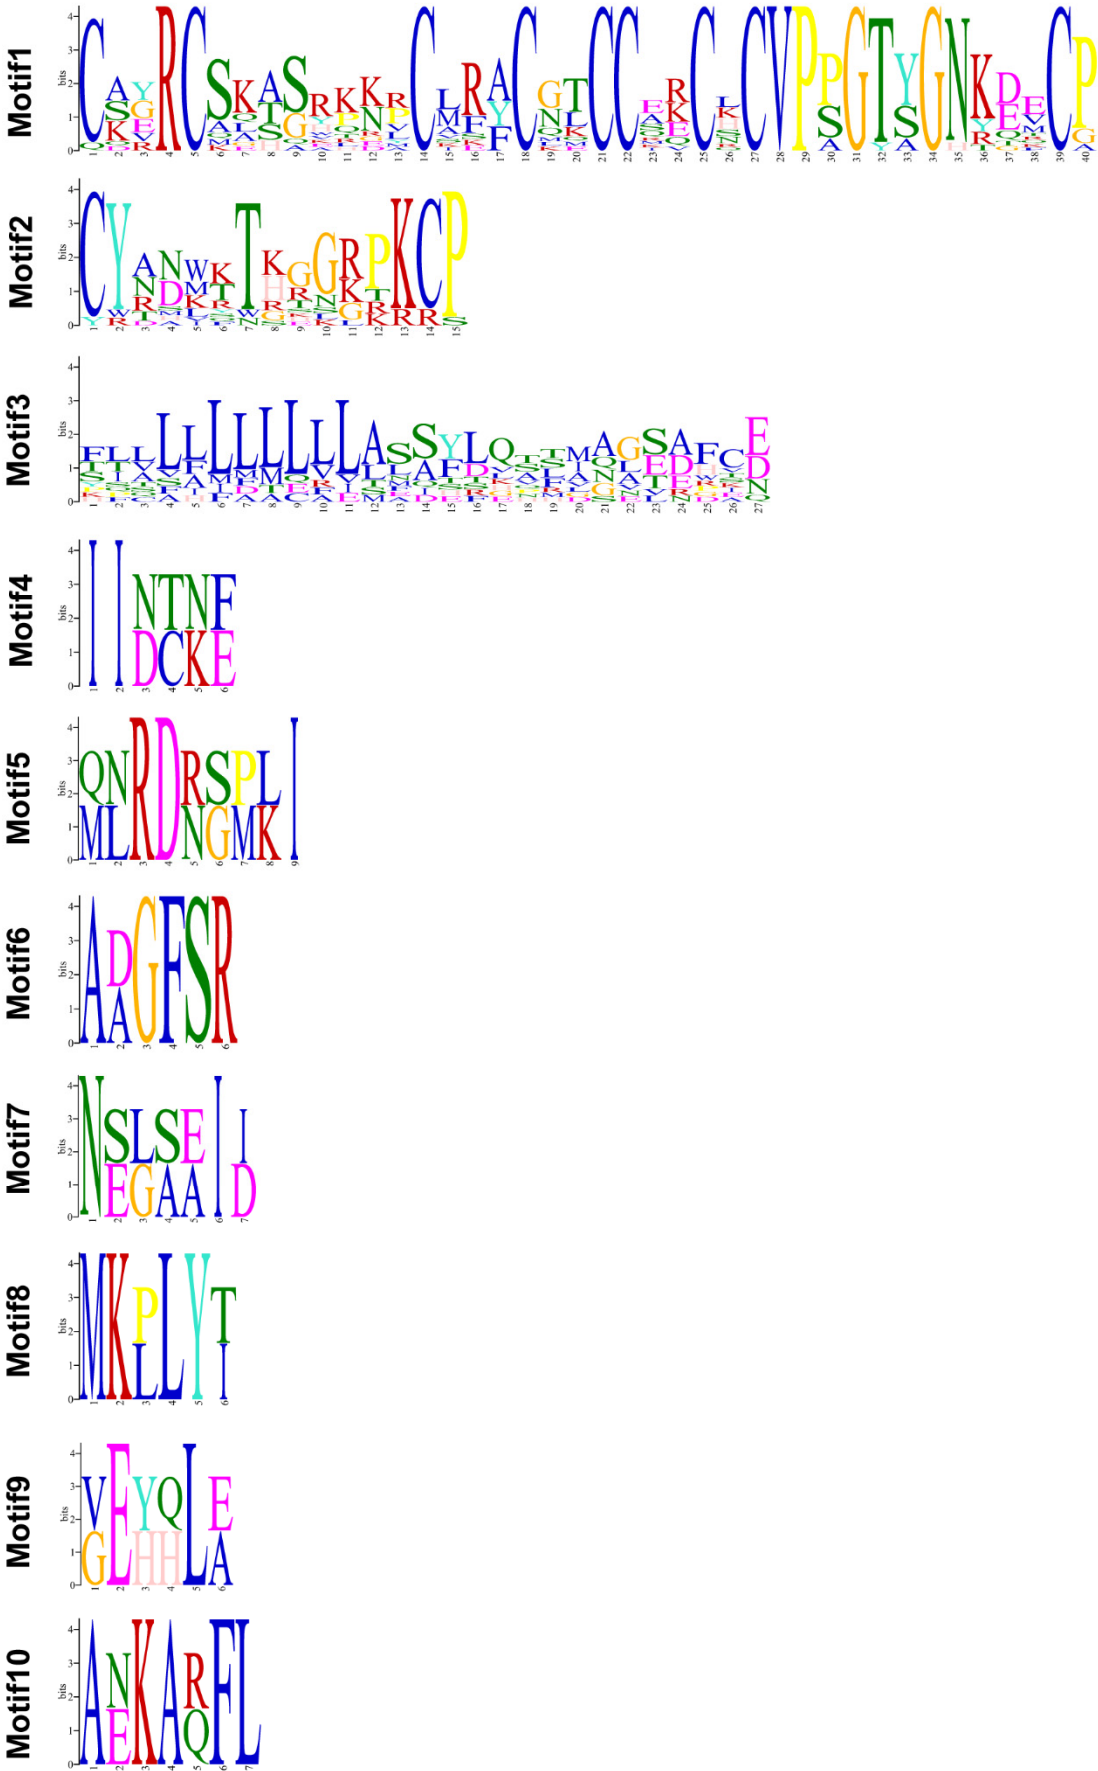

Supplement: s1 [file s1]
